# Supplementary material for: Synthesis and isolation of dinuclear N,C-chelate organoboron compounds bridged by neutral, anionic, and dianionic 4,4′-bipyridineviareductive coupling of pyridines
Source: Royal Society of Chemistry journal article supplement (doi:10.1039/d2dt02650c), 2022-01-01
Supplement: d2dt02650c1.pdf [file d2dt02650c1.pdf]

## Supporting Information

### Synthesis and Isolation of Dinuclear N,C-Chelate Organoboron Compounds Bridged by Neutral, Anionic and Dianionic 4,4'-Bipyridine via Reductive Coupling of Pyridines

Hai-Jun Li,<sup>‡</sup> Rui Feng,<sup>‡</sup> Xianghui Shi, Junnian Wei,\* Zhenfeng Xi

Email: jnwei@pku.edu.cn

*Beijing National Laboratory for Molecular Sciences (BNLMS), Key Laboratory of  
Bioorganic Chemistry and Molecular Engineering of Ministry of Education, College of  
Chemistry, Peking University, Beijing 100871, China*

#### Table of Contents

**S1. Experimental Materials and Methods**

**S2. NMR and HRMS Data**

**S3. Photochemical Reactivity Study**

**S4. Cyclic Voltammetric Studies**

**S5. IR spectra**

**S6. TD-DFT Calculation Data, UV/Vis Absorption Spectra and Calculated  
transitions, Fluorescent Spectra**

**S7. X-Ray Crystal Structure Data**

**S8. References**

## S1. Experimental Materials and Methods

### General methods

Starting materials were purchased from Sigma-Aldrich, TCI, J&K, and others without further purification. The compounds **BN1** and **BN3** were prepared by the reported method.<sup>S1, S2</sup> All reactions were carried out under nitrogen atmosphere. THF was dried by standard methods and freshly distilled over sodium before use. Other solvents were purified by an Mbraun SPS-800 Solvent Purification System. <sup>1</sup>H, <sup>13</sup>C, and <sup>11</sup>B NMR spectra were recorded on a Bruker Avance 500, 600 spectrometers and deuterated solvents were purchased from Cambridge Isotopes, J&K. High-resolution mass spectra (HRMS) were obtained using a Bruker Solarix XR Fourier Transform Ion Cyclotron Resonance Mass Spectrometer using ESI source. Elemental analyses were tested on a Vario EL elemental analyzer at the Analytical Center of Peking University. Infrared Spectra of solid samples were recorded on a Bruker AlphaII using a KBr pellet. X-ray single-crystal diffraction analyses were performed on an XtaLAB PRO 007HF(Mo). Cyclic voltammetry was performed on a CHI660E electrochemical workstation with platinum as the working electrode and Ag/AgNO<sub>3</sub> (0.1 M in CH<sub>3</sub>CN) as the reference electrode under an argon atmosphere. UV/Vis absorption spectra were measured on an Agilent Cary 60 UV-Vis spectrophotometer. EPR spectra were obtained using a Bruker Elexsys E580 spectrometer and simulated with MATLAB software. The photochemical reactor was purchased from Shanghai Lanyi (LY-GHX-V).

**Synthesis of BN2.** In the nitrogen filled glovebox, compound **BN1** (100.0 mg, 0.25 mmol) was dissolved in 15 mL THF, KC<sub>8</sub> (33.5 mg, 0.25 mmol) was added to the solution at room temperature, the reaction mixture was stirred at room temperature overnight. After completion of the reaction, the solution was taken out of the glovebox and quenched with water immediately and keep stirring for several minutes. The solvent was removed with a rotary evaporator and concentrated under vacuum, the residue was extracted with dichloromethane (15 mL × 3). The organic layer was collected, then dried with sodium sulfate and concentrated under vacuum. Further purification by column chromatography on silica gel (dichloromethane:hexanes = 1:3) to afford compound **BN2** as bright yellow solid in 17% yield (17 mg). <sup>1</sup>H NMR (600 MHz, CD<sub>2</sub>Cl<sub>2</sub>): 8.75 (d, *J* = 6.2 Hz, 2H), 8.30 (d, *J* = 1.6 Hz, 2H), 8.01 (d, *J* = 7.3 Hz, 2H), 7.77 (d, *J* = 7.3 Hz, 2H), 7.54 (dd, *J* = 6.2,

1.9 Hz, 2H), 7.37 (td,  $J = 7.3, 1.2$  Hz, 2H), 7.34 (td,  $J = 7.3, 1.2$  Hz, 2H), 6.65 (s, 8H), 2.16 (s, 12H), 1.81 (s, 24H);  $^{13}\text{C}$  NMR (151 MHz,  $\text{CD}_2\text{Cl}_2$ ): 161.5, 150.0, 148.3, 146.6, 141.2, 135.7, 135.3, 132.9, 132.3, 131.2, 128.1, 126.9, 123.3, 121.0, 117.4, 26.2, 21.7;  $^{11}\text{B}$  NMR (193 MHz,  $\text{CD}_2\text{Cl}_2$ ): 0.26; HRMS (ESI), calcd for  $\text{C}_{58}\text{H}_{59}\text{B}_2\text{N}_2$   $[\text{M}+\text{H}]^+$ : 805.4859, found: 805.4862.

**Synthesis of BN3.** The synthetic procedure was similar as **BN2**, compound **BN3** (100.0 mg, 0.24 mmol) reacted with 1 equivalent of  $\text{KC}_8$  (32.3 mg, 0.24 mmol) for 12 hours, the crude product was purified by column chromatography on silica gel (dichloromethane:hexanes = 1:4) to afford **BN4** as bright yellow solid in 41% yield.  $^1\text{H}$  NMR (500 MHz,  $\text{CD}_2\text{Cl}_2$ ): 8.66 (d,  $J = 6.3$  Hz, 2H), 8.16 (d,  $J = 2.0$  Hz, 2H), 7.63–7.59 (m, 2H), 7.53 (dd,  $J = 6.3, 2.1$  Hz, 2H), 7.08–7.02 (m, 4H), 6.82–6.77 (m, 2H), 6.49 (s, 8H); 2.74 (s, 4H), 2.05 (s, 12H), 1.79 (s, 24H);  $^{13}\text{C}$  NMR (126 MHz,  $\text{CD}_2\text{Cl}_2$ ): 157.5, 149.0, 148.3, 148.0, 141.7, 133.8, 131.5, 130.1, 129.8, 129.0, 128.7, 126.3, 124.6, 121.6, 120.7, 29.7, 24.8, 20.3;  $^{11}\text{B}$  NMR (161 MHz,  $\text{CD}_2\text{Cl}_2$ ): 1.27; HRMS (ESI), calcd for  $\text{C}_{60}\text{H}_{63}\text{B}_2\text{N}_2$   $[\text{M}+\text{H}]^+$ : 833.5172, found: 833.5189.

**Synthesis of BN2K and BN2K(crypt).** In the nitrogen-filled glovebox, compound **BN2** (10.4 mg, 0.013 mmol) was dissolved in 10 mL of THF,  $\text{KC}_8$  (1.7 mg, 0.013 mmol) was added to the solution at room temperature, the reaction mixture was stirred at room temperature overnight. The solution was filtered through Celite to give a green THF solution of **BN2K**. The THF solution of 2,2,2-cryptand (4.9 mg, 0.013 mmol) was added to the green solution and stirred at room temperature for 30 minutes. The solvent was removed under vacuum to give a green solid. The solid was washed with hexane for three times (2 mL  $\times$  3), and further purification was achieved by recrystallization in THF/diethyl ether/hexane mixture solvent at  $-30$  °C to give **BN2K(crypt)** as a green solid in near quantitative yield (15.8 mg). Anal. Calcd (%). for  $\text{C}_{80}\text{H}_{102}\text{B}_2\text{KN}_4\text{O}_7$  **[BN2K(crypt)THF]**: C 74.35%, H 7.95%, N 4.34%. Found: C 74.18%, H 8.48%, N 4.14%.

**Synthesis of BN2K<sub>2</sub> and BN2K<sub>2</sub>(18C6)<sub>2</sub>.** The synthetic procedure was similar to **BN2K**. Compound **BN2** (10.4 mg, 0.013 mmol) reacted with 2 equivalent of  $\text{KC}_8$  at room temperature overnight to generate **BN2K** as THF solution. Then 18-crown-6 (6.6 mg 0.025 mmol) was added to the solution at room temperature, the reaction mixture was

stirred at room temperature overnight. The resultant brown solution was filtered and concentrated under vacuum to give a brown solid. The solid was washed with hexane for three times (2 mL  $\times$  3), and further purification was achieved by recrystallization in THF/diethyl ether/hexane mixture solvent at -30 °C to give **BN2K<sub>2</sub>(18c6)<sub>2</sub>** as brown solid in 90% yield (15.5 mg). Anal. Calcd (%). for C<sub>106</sub>H<sub>154</sub>B<sub>2</sub>K<sub>2</sub>N<sub>2</sub>O<sub>18</sub> [**BN2K<sub>2</sub>(18c6)<sub>2</sub>**](THF)<sub>6</sub>]: C 69.04%, H 8.42%, N 1.52%. Found: C 68.36%, H 8.24%, N 1.82%. NMR for **BN2K<sub>2</sub>**: <sup>1</sup>H NMR (600 MHz, THF-*d*<sub>8</sub>): 7.38 – 7.34 (m, 2H), 7.32 (d, *J* = 7.5 Hz, 1H), 7.18 (d, *J* = 7.4 Hz, 1H), 6.81 (t, *J* = 7.3 Hz, 1H), 6.78–6.71 (m, 3H), 6.45 (s, 4H), 6.43 (s, 4H), 6.06 (d, *J* = 7.7 Hz, 1H), 5.89 (d, *J* = 1.8 Hz, 1H), 5.70 (d, *J* = 1.8 Hz, 1H), 5.09 (dd, *J* = 7.7, 1.8 Hz, 1H), 4.87 (dd, *J* = 7.5, 1.7 Hz, 1H), 2.08 (s, 6H), 2.07 (s, 6H), 1.97 (s, 24H); <sup>13</sup>C NMR (126 MHz, THF-*d*<sub>8</sub>): 164.2, 154.1, 148.5, 148.5, 140.9, 140.8, 140.7, 138.2, 133.7, 131.7, 131.6, 131.3, 131.2, 129.6, 129.6, 127.7, 125.8, 125.8, 123.3, 123.2, 118.6, 118.5, 107.9, 107.9, 104.4, 96.8, 96.6, 26.5, 26.4, 21.1; <sup>11</sup>B NMR (193 MHz, THF-*d*<sub>8</sub>): - 0.55.

## S2. NMR and HRMS Data

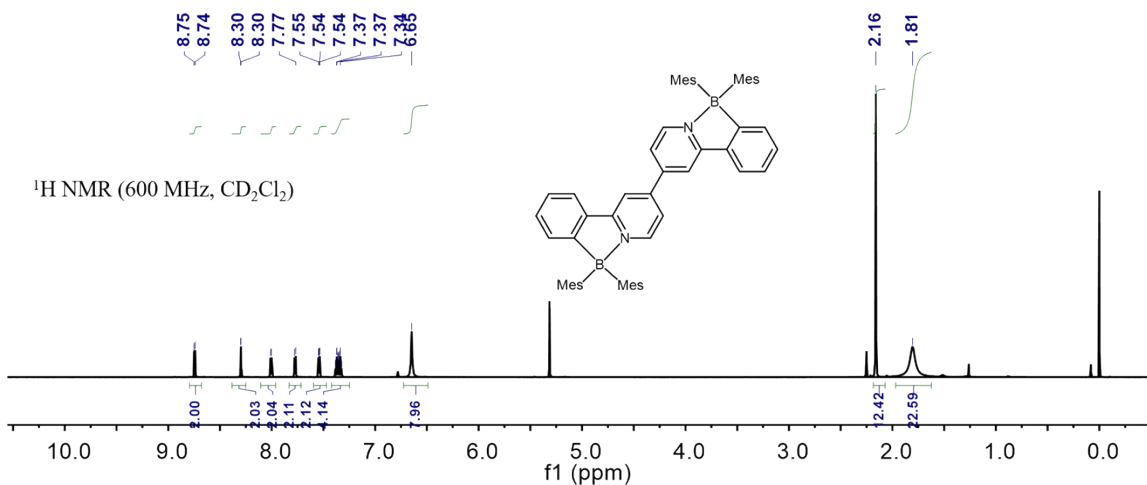

Figure S1. <sup>1</sup>H NMR spectrum of **BN2** in CD<sub>2</sub>Cl<sub>2</sub>.

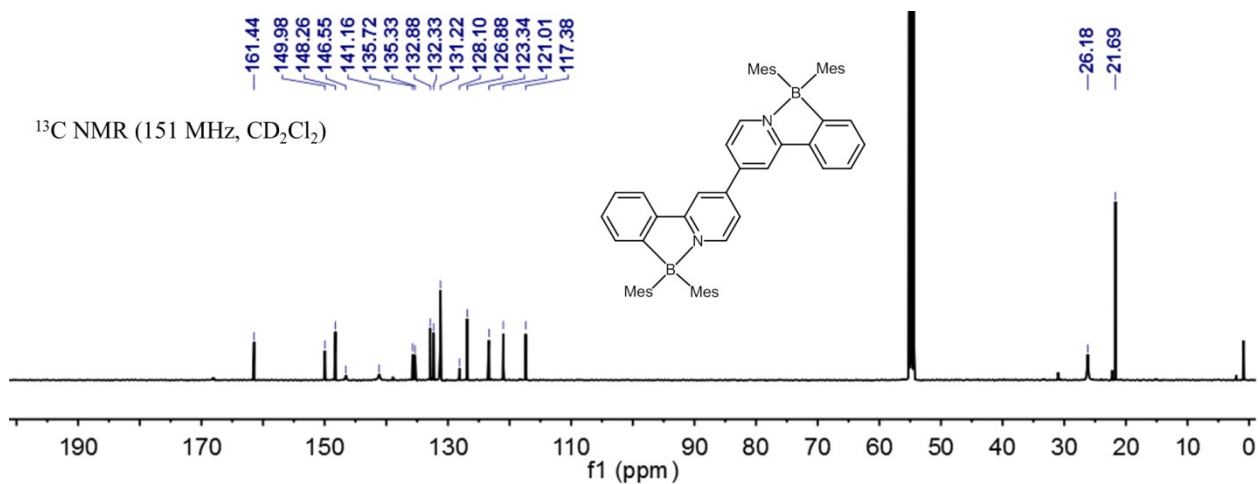

Figure S2. <sup>13</sup>C NMR spectrum of **BN2** in CD<sub>2</sub>Cl<sub>2</sub>.

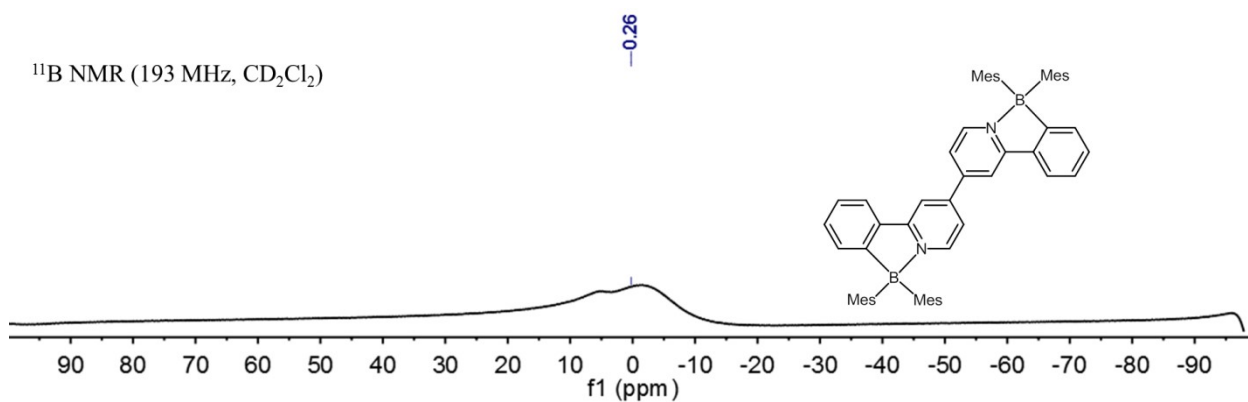

Figure S3. <sup>11</sup>B NMR spectrum of **BN2** in CD<sub>2</sub>Cl<sub>2</sub>.

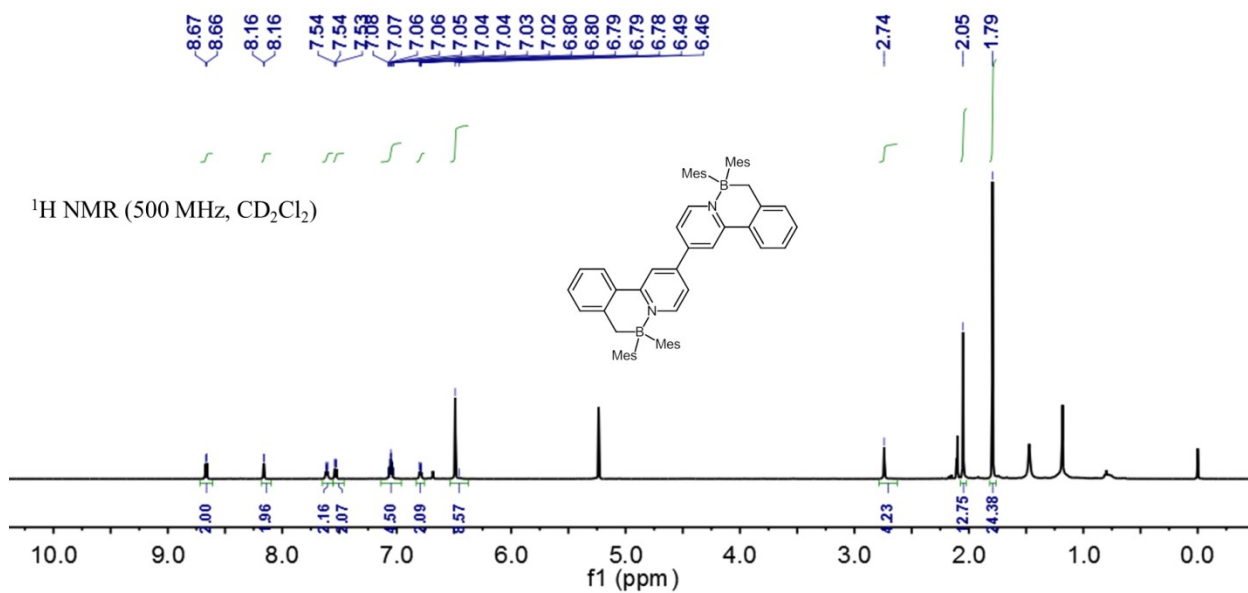

Figure S4. <sup>1</sup>H NMR spectrum of **BN4** in CD<sub>2</sub>Cl<sub>2</sub>.

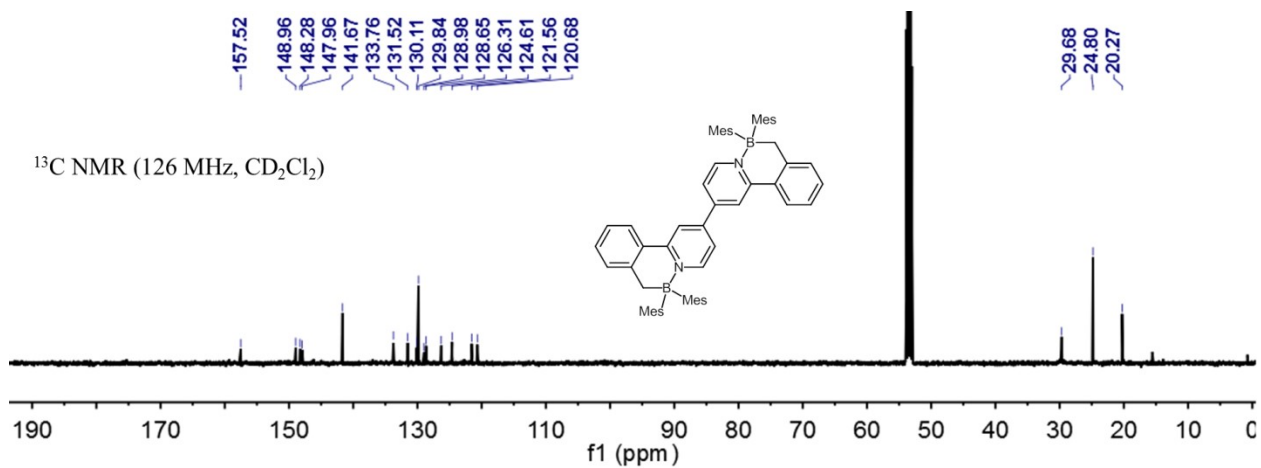

Figure S5.  $^{13}\text{C}$  NMR spectrum of **BN4** in  $\text{CD}_2\text{Cl}_2$ .

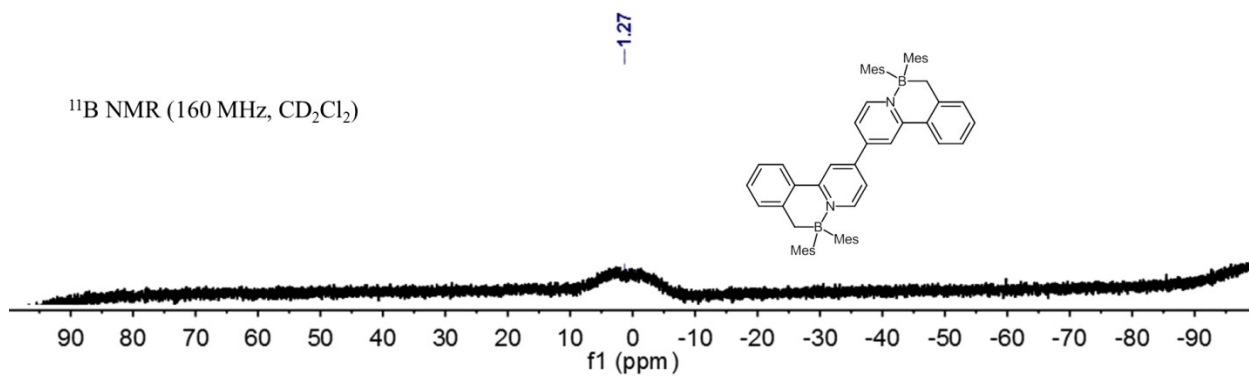

Figure S6.  $^{11}\text{B}$  NMR spectrum of **BN4** in  $\text{CD}_2\text{Cl}_2$ .

## Peking University Mass Spectrometry Sample Analysis Report

### Analysis Info

Analysis Name FTMS-22040271\_Pos\_20220425\_000005.d  
 Sample LH-20220425-1  
 Comment

Acquisition Date 4/25/2022 3:55:41 PM  
 Instrument Bruker Solarix XR FTMS  
 Operator Peking University

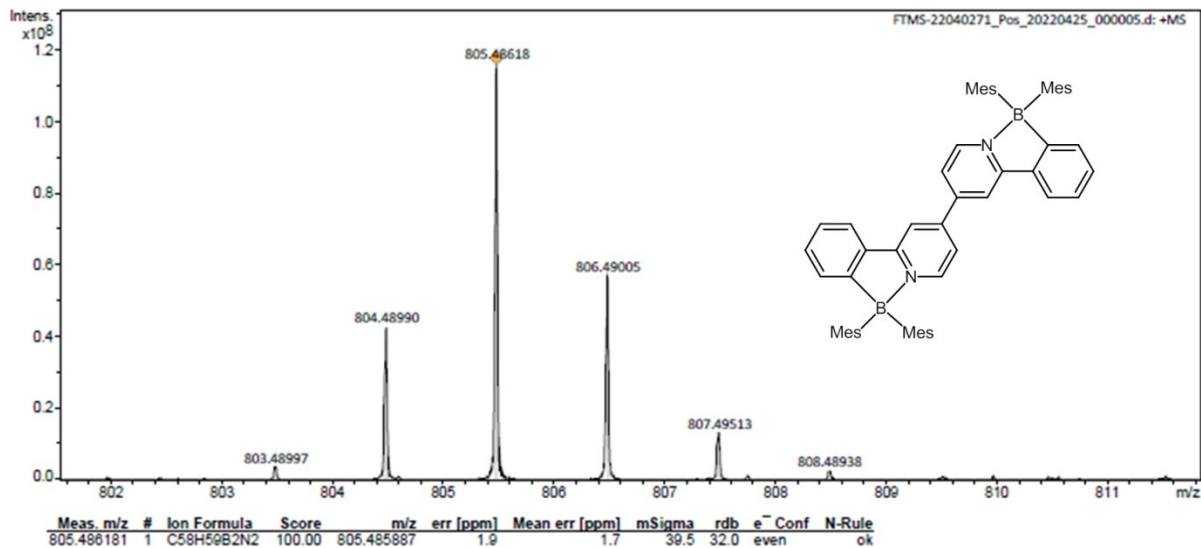

Figure S7. HRMS spectrum of **BN2**.

## Peking University Mass Spectrometry Sample Analysis Report

### Analysis Info

Analysis Name FTMS-21080172\_Pos\_20210830\_000001.d  
 Sample LH-20210829-2  
 Comment

Acquisition Date 8/30/2021 2:21:07 PM  
 Instrument Bruker Solarix XR FTMS  
 Operator Peking University

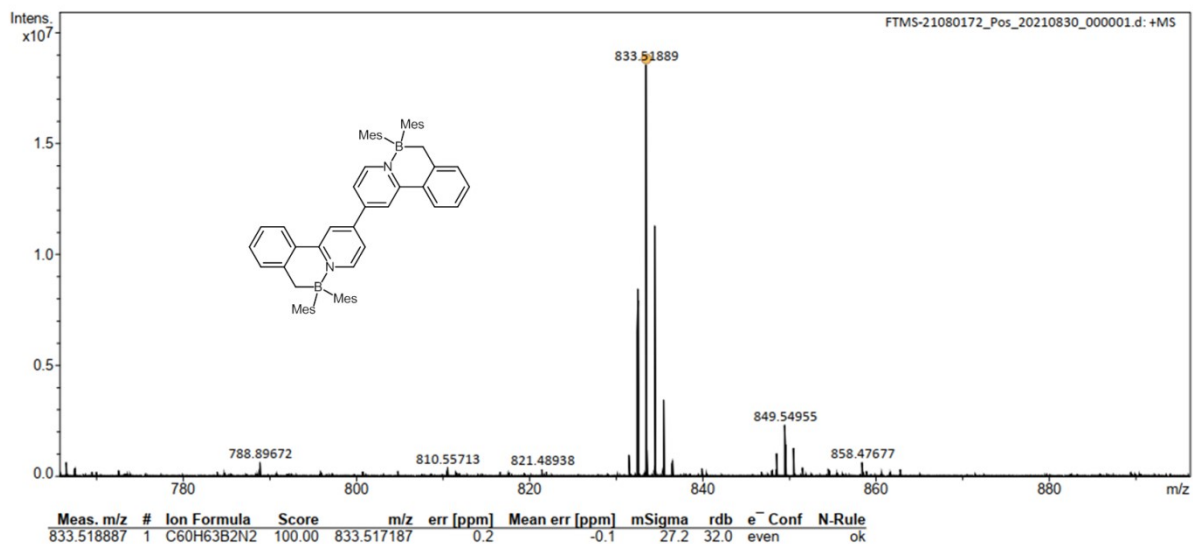

Figure S8. HRMS spectrum of **BN4**.

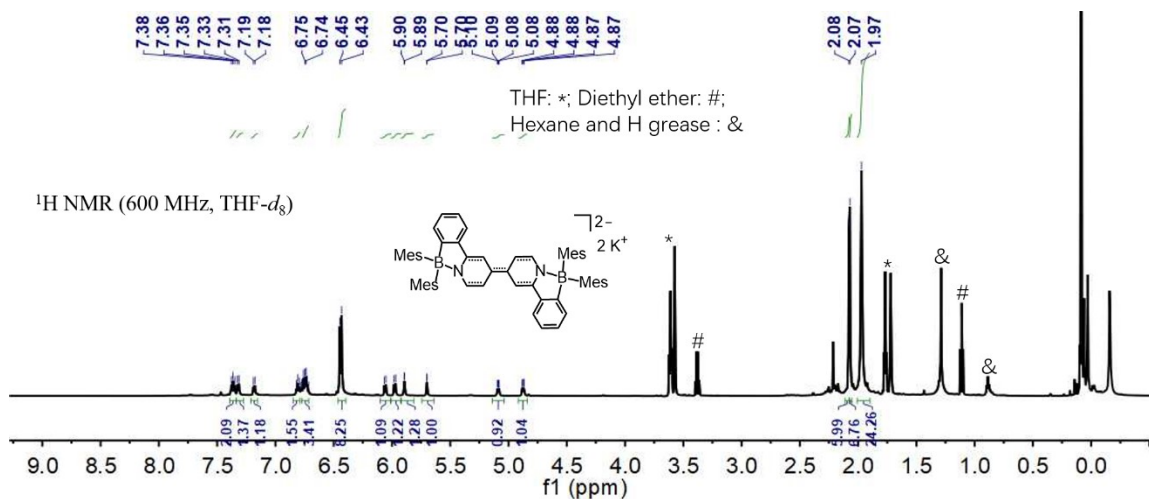

Figure S9. <sup>1</sup>H NMR spectrum of **BN2K2** in THF-*d*<sub>8</sub>.

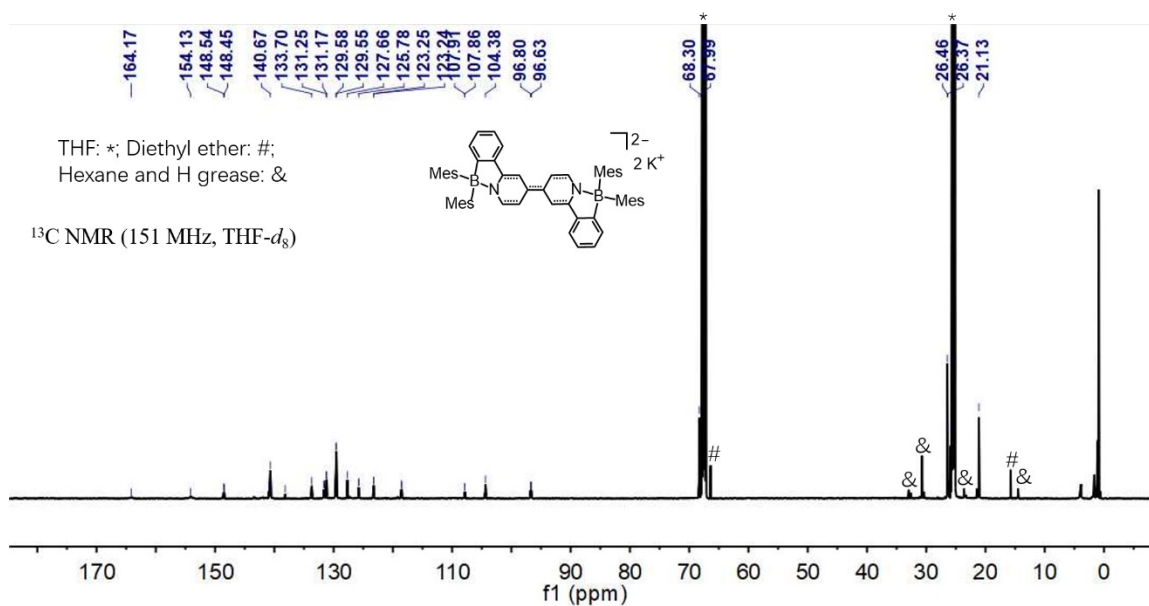

Figure S10. <sup>13</sup>C NMR spectrum of **BN2K2** in THF-*d*<sub>8</sub>.

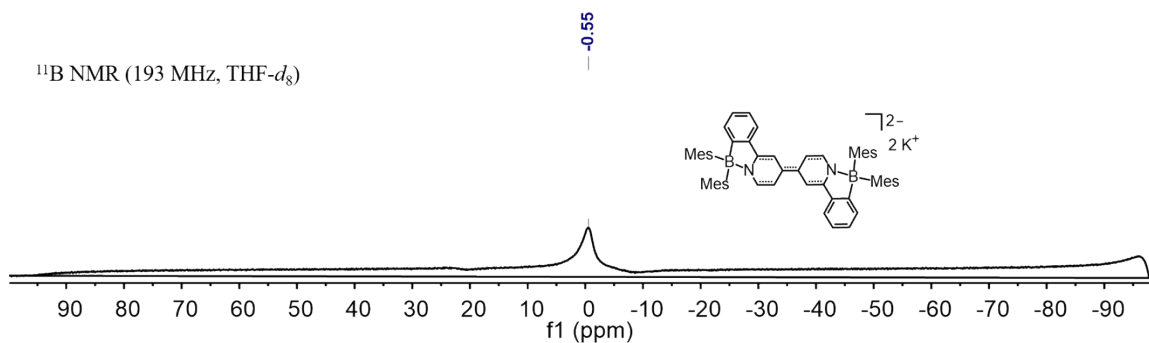

Figure S11. <sup>11</sup>B NMR spectrum of **BN2K2** in THF-*d*<sub>8</sub>.



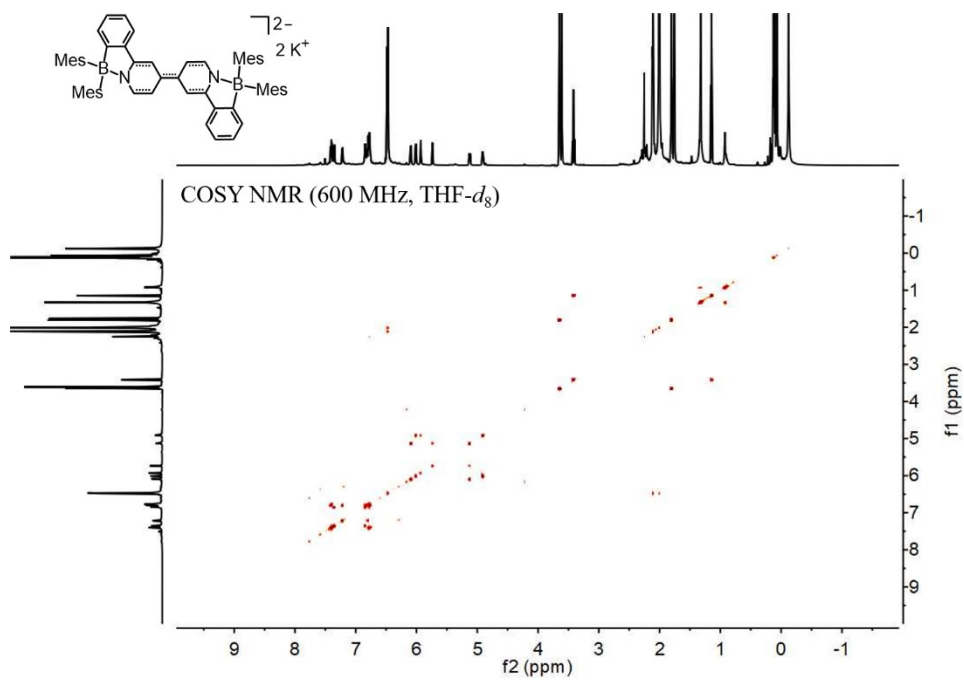

Figure S12. COSY NMR spectrum of **BN2K2** in THF- $d_8$ .

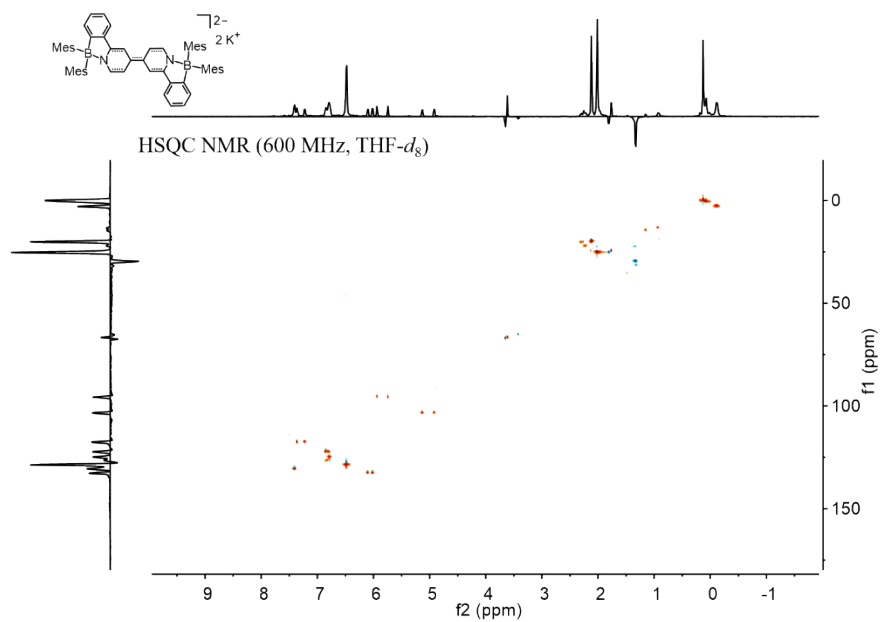

Figure S13. HSQC NMR spectrum of **BN2K2** in THF- $d_8$ .

### S3. Photochemical Reactivity Study

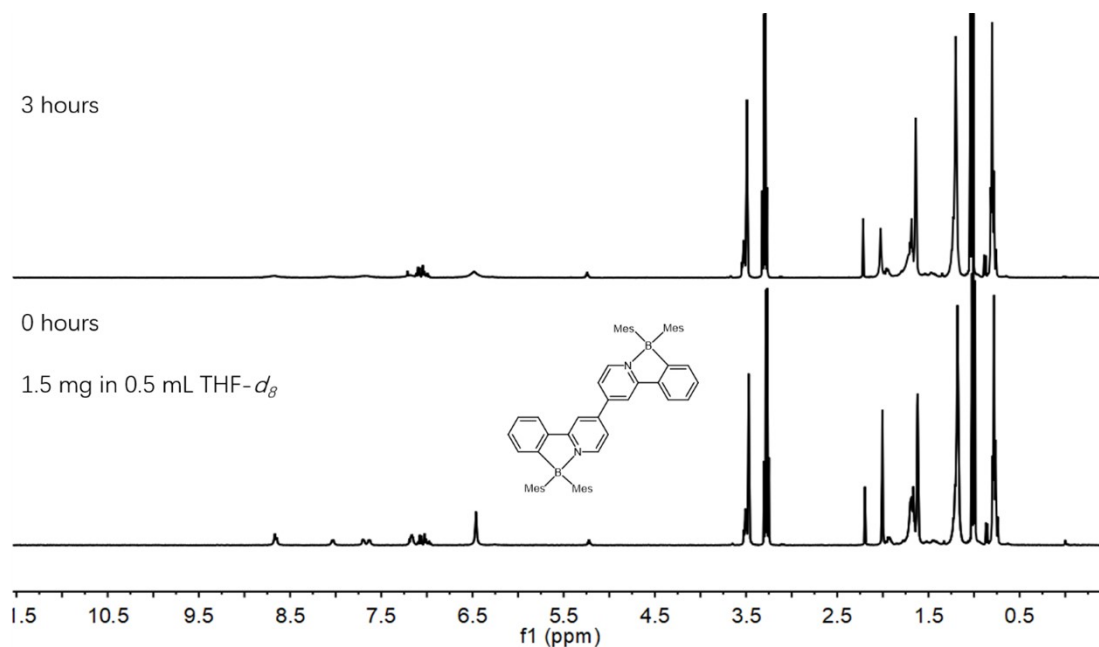

Figure S14. NMR tracking experiment of **BN2** in THF- $d_8$  upon UV light (300 nm) irradiation.

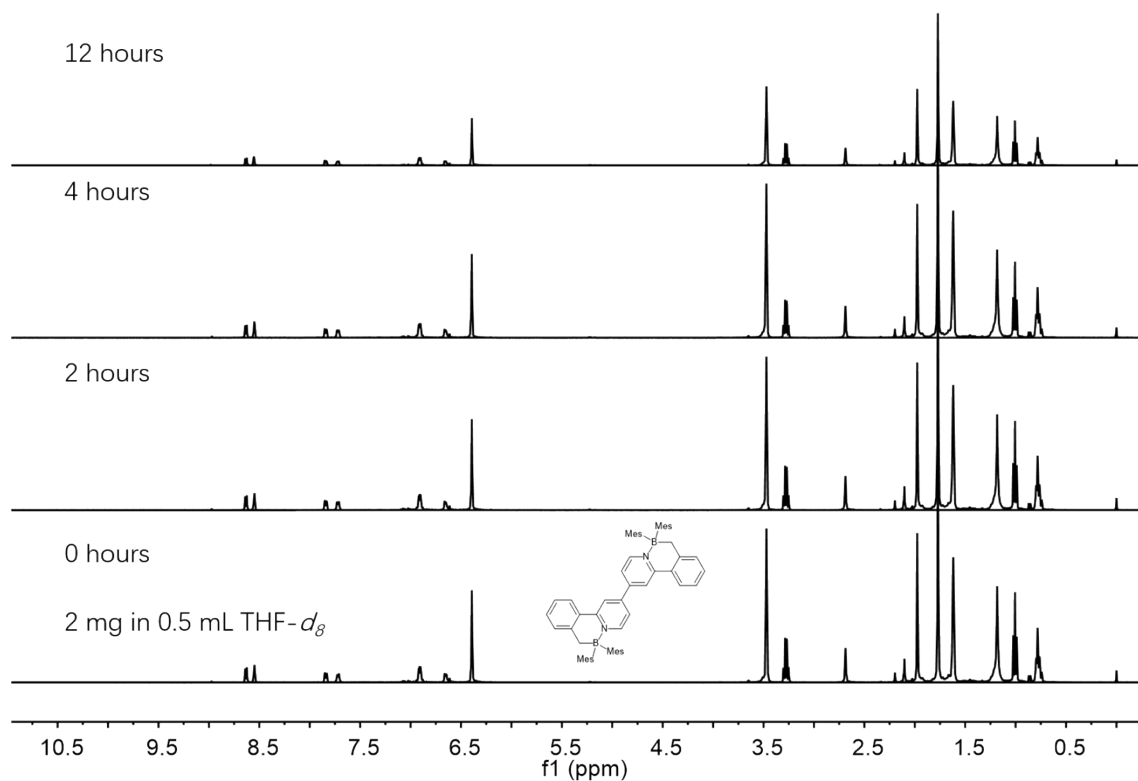

Figure S15. NMR tracking experiment of **BN4** in THF- $d_8$  upon UV light (300 nm) irradiation.

#### S4. Cyclic Voltammetric Studies

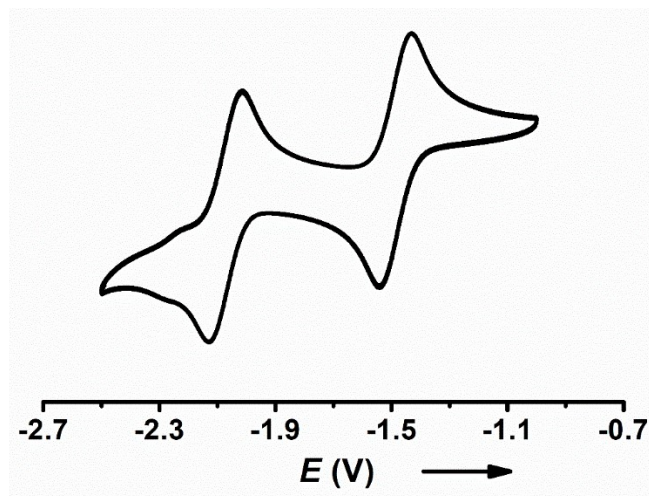

Figure S16. The cyclic voltammogram of compound **BN2** in THF at room temperature containing 0.1 M *n*-Bu<sub>4</sub>NPF<sub>6</sub> as the supporting electrolyte (scan rate: 100 mV/s;  $E_{1/2}(\text{Fc}^+/\text{Fc}) = 0.14$  V).

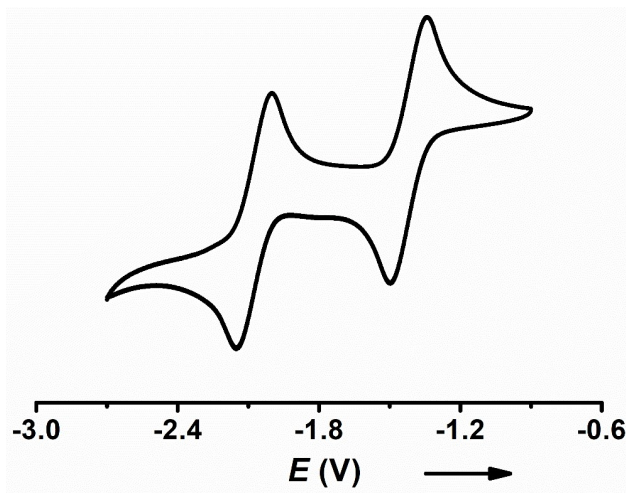

Figure S17. The cyclic voltammogram of compound **BN4** in THF at room temperature containing 0.1 M *n*-Bu<sub>4</sub>NPF<sub>6</sub> as the supporting electrolyte (scan rate: 100 mV/s;  $E_{1/2}(\text{Fc}^+/\text{Fc}) = 0.14$  V).

## S5. IR spectra

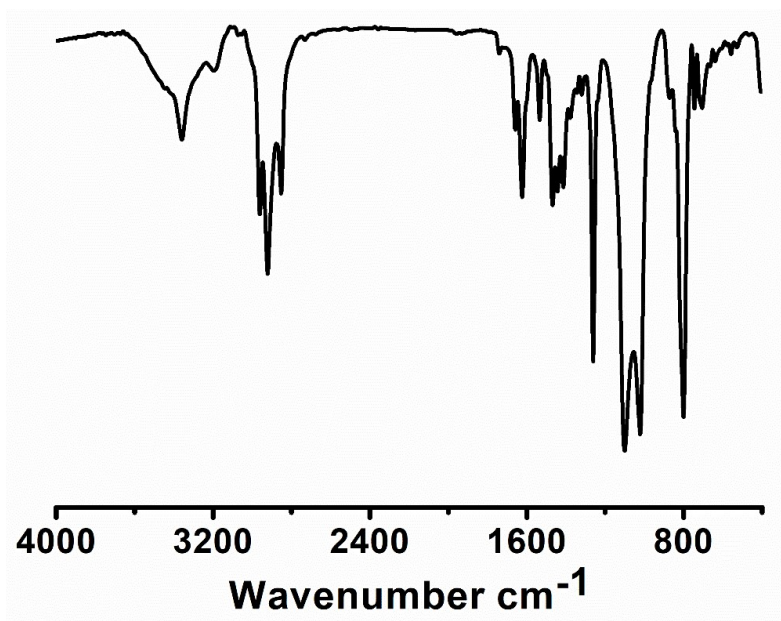

Figure S18. IR spectrum of BN2.

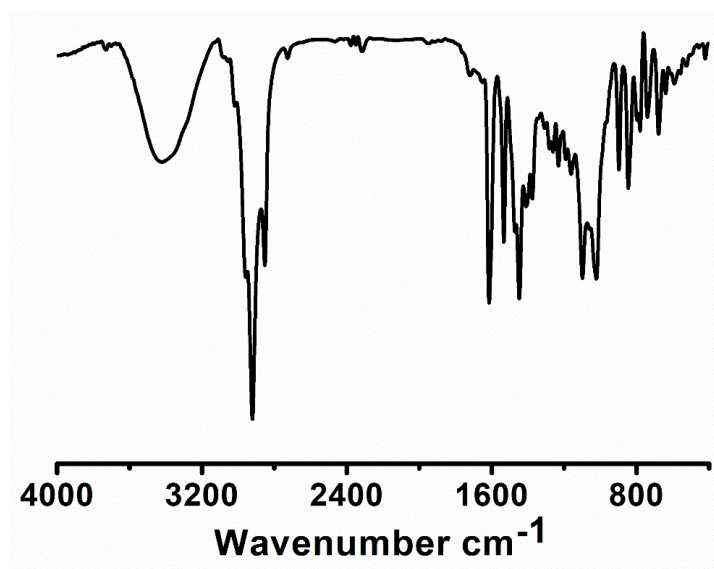

Figure S19. IR spectrum of BN4.

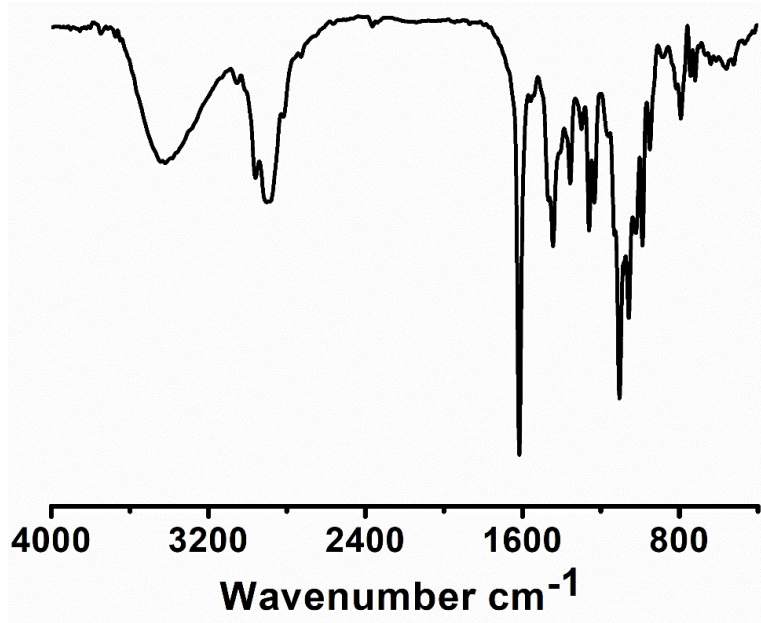

Figure S20. IR spectrum of BN2K(crypt).

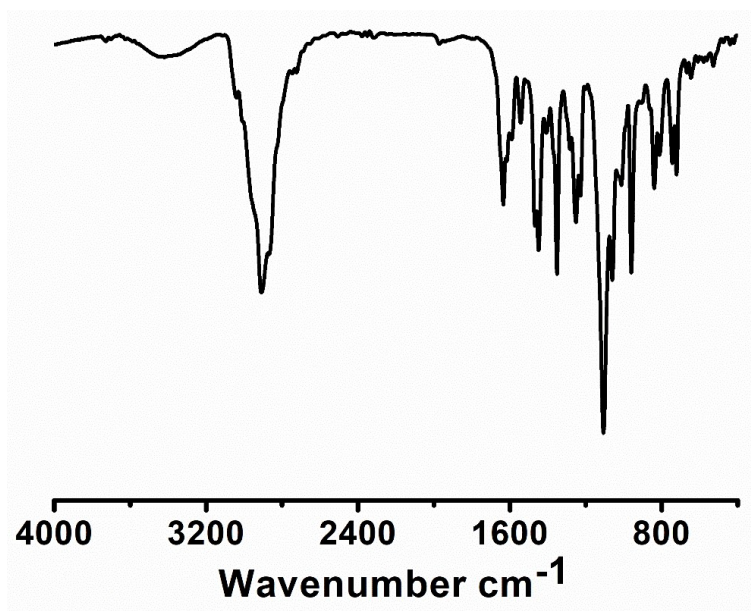

Figure S21. IR spectrum of BN2K<sub>2</sub>(18c6)<sub>2</sub>.

#### S6. TD-DFT Calculation Data, UV/Vis Absorption Spectra and Calculated transitions, Fluorescent Spectra

All calculations were performed with the Gaussian 16 program suite.<sup>S3</sup> All the geometry optimizations were performed with the PBE1PBE functional and def2svp basis set.

Frequency calculations were carried out to confirm that all optimized geometries correspond to energy minima, and no imaginary frequency was found. The absolute energy and frequency values were shown as follows. UV-Visible spectra were recorded on an Agilent Cary 60 UV-Vis spectrophotometer. The UV-Vis absorption spectra were calculated using the PBE1PBE functional and def2svp basis set and polarized continuum model (PCM) was adopted to consider solvent (THF) effects.

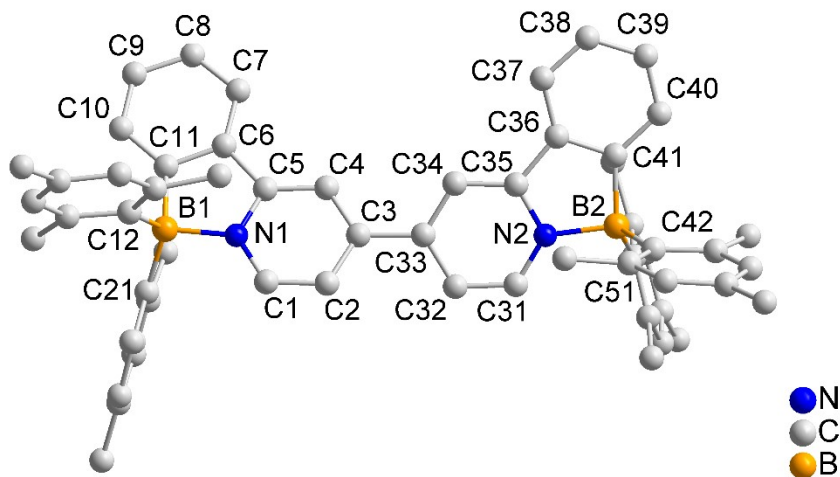

Figure S22. Structure of **BN2** calculated at the PBE1PBE/def2svp level of theory. H atoms are omitted for clarity.

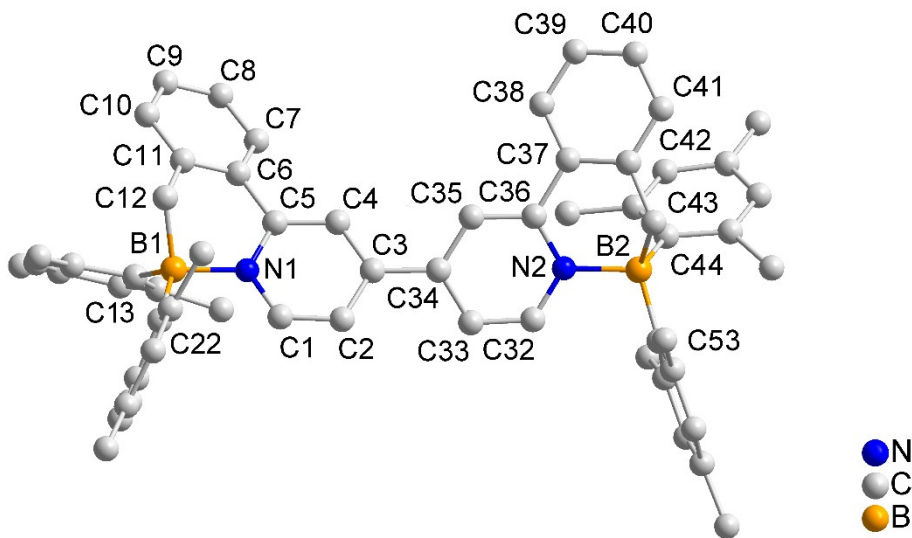

Figure S23. Structure of **BN4** calculated at the PBE1PBE/def2svp level of theory. H atoms are omitted for clarity.

## Coordinates, absolute energy ( $E_a$ ) and frequency values of the model molecules

**BN2**,  $E_a = -2399.99911$  a.u.

---

| Center<br>Number | Atomic<br>Number | Atomic<br>Type | Coordinates (Angstroms) |          |          |
|------------------|------------------|----------------|-------------------------|----------|----------|
|                  |                  |                | X                       | Y        | Z        |
| 1                | 7                | 0              | 3.515518                | -0.0174  | -0.01976 |
| 2                | 7                | 0              | -3.51526                | 0.064681 | -0.03212 |
| 3                | 6                | 0              | 0.738963                | 0.035748 | 0.000789 |
| 4                | 6                | 0              | -0.73853                | 0.05758  | -0.00313 |
| 5                | 6                | 0              | 3.748759                | -1.6774  | 1.567621 |
| 6                | 6                | 0              | 1.479196                | 0.924106 | -0.8012  |
| 7                | 1                | 0              | 0.984652                | 1.673683 | -1.41952 |
| 8                | 6                | 0              | 2.836585                | -0.86275 | 0.790022 |
| 9                | 6                | 0              | 2.859541                | 0.874784 | -0.76823 |
| 10               | 1                | 0              | 3.474574                | 1.566864 | -1.34281 |
| 11               | 6                | 0              | -1.46242                | -0.13888 | 1.170585 |
| 12               | 1                | 0              | -0.95465                | -0.26801 | 2.126927 |
| 13               | 6                | 0              | -2.85933                | -0.12093 | 1.136987 |
| 14               | 6                | 0              | 5.956209                | -0.91777 | -1.02535 |
| 15               | 6                | 0              | 5.080203                | -1.27246 | 1.33915  |
| 16               | 6                | 0              | -1.45461                | 0.293968 | -1.19114 |
| 17               | 1                | 0              | -0.94014                | 0.452059 | -2.13934 |
| 18               | 6                | 0              | 5.384656                | -1.75749 | -2.01239 |
| 19               | 6                | 0              | 1.439301                | -0.8559  | 0.809738 |
| 20               | 1                | 0              | 0.9124                  | -1.56432 | 1.449772 |
| 21               | 6                | 0              | 5.567594                | 1.423134 | 0.429485 |
| 22               | 6                | 0              | 7.373356                | -0.83232 | -0.99324 |
| 23               | 6                | 0              | -2.83584                | 0.298257 | -1.15912 |
| 24               | 1                | 0              | -3.4323                 | 0.491653 | -2.05031 |
| 25               | 6                | 0              | 5.520695                | 2.00857  | 1.721308 |
| 26               | 6                | 0              | -3.79329                | -0.25884 | 2.236559 |

---

|    |   |   |          |          |          |
|----|---|---|----------|----------|----------|
| 27 | 6 | 0 | 3.404251 | -2.7212  | 2.436776 |
| 28 | 1 | 0 | 2.361271 | -3.01475 | 2.583181 |
| 29 | 6 | 0 | 6.194744 | -2.39814 | -2.95785 |
| 30 | 1 | 0 | 5.717678 | -3.02712 | -3.71677 |
| 31 | 6 | 0 | 5.905115 | 2.278176 | -0.65245 |
| 32 | 6 | 0 | -5.11358 | -0.05587 | 1.784211 |
| 33 | 6 | 0 | 8.146411 | -1.49998 | -1.94948 |
| 34 | 1 | 0 | 9.23645  | -1.40266 | -1.90183 |
| 35 | 6 | 0 | 6.082197 | -1.99482 | 1.999775 |
| 36 | 1 | 0 | 7.134185 | -1.75804 | 1.829329 |
| 37 | 6 | 0 | -5.52837 | 1.520118 | -0.59757 |
| 38 | 6 | 0 | 5.754658 | -3.02469 | 2.877321 |
| 39 | 1 | 0 | 6.552227 | -3.56511 | 3.394258 |
| 40 | 6 | 0 | 7.582165 | -2.27906 | -2.95696 |
| 41 | 6 | 0 | 4.419725 | -3.39066 | 3.103025 |
| 42 | 1 | 0 | 4.183479 | -4.20816 | 3.787811 |
| 43 | 6 | 0 | 6.231427 | 3.622014 | -0.41921 |
| 44 | 1 | 0 | 6.489912 | 4.2546   | -1.27502 |
| 45 | 6 | 0 | 5.864805 | 3.350383 | 1.911646 |
| 46 | 1 | 0 | 5.824895 | 3.765454 | 2.924133 |
| 47 | 6 | 0 | -3.47733 | -0.54915 | 3.570542 |
| 48 | 1 | 0 | -2.44224 | -0.70634 | 3.885583 |
| 49 | 6 | 0 | -5.97713 | -1.21172 | -0.31698 |
| 50 | 6 | 0 | 5.090359 | 1.242263 | 2.944366 |
| 51 | 1 | 0 | 4.101516 | 0.777759 | 2.816136 |
| 52 | 1 | 0 | 5.034605 | 1.906334 | 3.818679 |
| 53 | 1 | 0 | 5.783491 | 0.423831 | 3.187646 |
| 54 | 6 | 0 | 3.906565 | -2.04123 | -2.10288 |
| 55 | 1 | 0 | 3.513473 | -2.45077 | -1.16    |
| 56 | 1 | 0 | 3.706677 | -2.78582 | -2.88601 |
| 57 | 1 | 0 | 3.311055 | -1.14889 | -2.34925 |
| 58 | 6 | 0 | -6.13517 | -0.19966 | 2.731716 |



|    |   |   |          |          |          |
|----|---|---|----------|----------|----------|
| 59 | 1 | 0 | -7.18039 | -0.09975 | 2.43281  |
| 60 | 6 | 0 | 6.239079 | 4.180044 | 0.855516 |
| 61 | 6 | 0 | -5.42695 | -2.49388 | -0.56309 |
| 62 | 6 | 0 | -5.46903 | 2.774601 | 0.06344  |
| 63 | 6 | 0 | -5.84108 | 1.537144 | -1.98236 |
| 64 | 6 | 0 | 8.142934 | -0.0105  | 0.014164 |
| 65 | 1 | 0 | 8.29118  | 1.022973 | -0.33926 |
| 66 | 1 | 0 | 9.139088 | -0.44742 | 0.180464 |
| 67 | 1 | 0 | 7.641878 | 0.079977 | 0.984529 |
| 68 | 6 | 0 | 5.96459  | 1.842069 | -2.09904 |
| 69 | 1 | 0 | 6.939572 | 1.39319  | -2.3466  |
| 70 | 1 | 0 | 5.82216  | 2.708047 | -2.76283 |
| 71 | 1 | 0 | 5.22509  | 1.077143 | -2.36759 |
| 72 | 6 | 0 | -5.83581 | -0.47426 | 4.063243 |
| 73 | 1 | 0 | -6.64797 | -0.56614 | 4.789428 |
| 74 | 6 | 0 | -6.13323 | 2.746927 | -2.62886 |
| 75 | 1 | 0 | -6.3736  | 2.725381 | -3.69712 |
| 76 | 6 | 0 | -6.1293  | 3.970075 | -1.96543 |
| 77 | 6 | 0 | -5.77863 | 3.956741 | -0.61606 |
| 78 | 1 | 0 | -5.73027 | 4.905128 | -0.07087 |
| 79 | 6 | 0 | -4.51092 | -0.64576 | 4.490108 |
| 80 | 1 | 0 | -4.2968  | -0.86851 | 5.53776  |
| 81 | 6 | 0 | -7.39092 | -1.09564 | -0.37314 |
| 82 | 6 | 0 | -6.25134 | -3.56314 | -0.93285 |
| 83 | 1 | 0 | -5.79086 | -4.53784 | -1.12534 |
| 84 | 6 | 0 | -5.9085  | 0.306349 | -2.85823 |
| 85 | 1 | 0 | -5.1942  | -0.47979 | -2.58301 |
| 86 | 1 | 0 | -5.73419 | 0.578848 | -3.91003 |
| 87 | 1 | 0 | -6.8971  | -0.17636 | -2.80191 |
| 88 | 6 | 0 | -8.14093 | 0.185199 | -0.09155 |
| 89 | 1 | 0 | -7.63913 | 0.841328 | 0.628533 |
| 90 | 1 | 0 | -9.14774 | -0.03992 | 0.291305 |

|     |   |   |          |          |          |
|-----|---|---|----------|----------|----------|
| 91  | 1 | 0 | -8.26352 | 0.788483 | -1.00586 |
| 92  | 6 | 0 | 6.638067 | 5.60867  | 1.088606 |
| 93  | 1 | 0 | 6.527863 | 6.214524 | 0.177206 |
| 94  | 1 | 0 | 7.693517 | 5.677086 | 1.402244 |
| 95  | 1 | 0 | 6.0347   | 6.072635 | 1.883642 |
| 96  | 5 | 0 | 5.135772 | -0.14154 | 0.170466 |
| 97  | 6 | 0 | -7.6343  | -3.43798 | -1.04224 |
| 98  | 6 | 0 | -5.06182 | 2.913144 | 1.506783 |
| 99  | 1 | 0 | -5.77723 | 2.430847 | 2.188728 |
| 100 | 1 | 0 | -4.9903  | 3.972975 | 1.789846 |
| 101 | 1 | 0 | -4.08548 | 2.448657 | 1.709023 |
| 102 | 6 | 0 | -3.95947 | -2.80662 | -0.41415 |
| 103 | 1 | 0 | -3.32844 | -2.26915 | -1.13827 |
| 104 | 1 | 0 | -3.7791  | -3.8798  | -0.56724 |
| 105 | 1 | 0 | -3.59269 | -2.55719 | 0.593164 |
| 106 | 6 | 0 | -8.17961 | -2.1941  | -0.73386 |
| 107 | 1 | 0 | -9.26693 | -2.06738 | -0.77216 |
| 108 | 5 | 0 | -5.13821 | 0.117818 | 0.166644 |
| 109 | 6 | 0 | 8.435509 | -3.00256 | -3.95885 |
| 110 | 1 | 0 | 8.78146  | -3.97141 | -3.56002 |
| 111 | 1 | 0 | 9.332762 | -2.42126 | -4.21986 |
| 112 | 1 | 0 | 7.882096 | -3.21054 | -4.88656 |
| 113 | 6 | 0 | -6.49207 | 5.248129 | -2.66508 |
| 114 | 1 | 0 | -6.36741 | 5.163723 | -3.75467 |
| 115 | 1 | 0 | -5.87671 | 6.090382 | -2.31382 |
| 116 | 1 | 0 | -7.5452  | 5.516298 | -2.47529 |
| 117 | 6 | 0 | -8.49629 | -4.58884 | -1.47509 |
| 118 | 1 | 0 | -8.63362 | -4.59185 | -2.56993 |
| 119 | 1 | 0 | -9.49805 | -4.53613 | -1.02295 |
| 120 | 1 | 0 | -8.04846 | -5.55583 | -1.20122 |

---

**BN4**,  $E_a = -2478.45432$  a.u.

---

| Center<br>Number | Atomic<br>Number | Atomic<br>Type | Coordinates (Angstroms) |          |          |
|------------------|------------------|----------------|-------------------------|----------|----------|
|                  |                  |                | X                       | Y        | Z        |
| 1                | 7                | 0              | 3.551478                | 0.191413 | 0.30792  |
| 2                | 7                | 0              | -3.51453                | 0.411307 | 0.247298 |
| 3                | 6                | 0              | 0.758931                | 0.294017 | 0.260631 |
| 4                | 6                | 0              | -0.71714                | 0.33866  | 0.251952 |
| 5                | 6                | 0              | 3.559219                | -2.23276 | 0.546583 |
| 6                | 6                | 0              | 1.527923                | 1.452745 | 0.095455 |
| 7                | 1                | 0              | 1.067274                | 2.433891 | -0.02446 |
| 8                | 6                | 0              | 2.839607                | -0.95738 | 0.437914 |
| 9                | 6                | 0              | 2.906073                | 1.353437 | 0.14134  |
| 10               | 1                | 0              | 3.550457                | 2.23102  | 0.05669  |
| 11               | 6                | 0              | -1.47025                | -0.48662 | 1.084692 |
| 12               | 1                | 0              | -0.97472                | -1.14455 | 1.798239 |
| 13               | 6                | 0              | -2.86903                | -0.45926 | 1.067407 |
| 14               | 6                | 0              | 5.920301                | -0.53193 | -0.88241 |
| 15               | 6                | 0              | 4.837903                | -2.23685 | 1.139923 |
| 16               | 6                | 0              | -1.41658                | 1.217574 | -0.58308 |
| 17               | 1                | 0              | -0.90067                | 1.886716 | -1.27255 |
| 18               | 6                | 0              | 5.293936                | -0.96856 | -2.07918 |
| 19               | 6                | 0              | 1.441333                | -0.9077  | 0.439157 |
| 20               | 1                | 0              | 0.89071                 | -1.83879 | 0.571209 |
| 21               | 6                | 0              | 5.670797                | 1.728722 | 0.75312  |
| 22               | 6                | 0              | 7.307338                | -0.8174  | -0.76113 |
| 23               | 6                | 0              | -2.79853                | 1.22429  | -0.54182 |
| 24               | 1                | 0              | -3.38603                | 1.908298 | -1.15693 |
| 25               | 6                | 0              | 5.573236                | 2.301022 | 2.053737 |
| 26               | 6                | 0              | -3.65619                | -1.37113 | 1.907722 |
| 27               | 6                | 0              | 3.00393                 | -3.41661 | 0.040426 |
| 28               | 1                | 0              | 2.029773                | -3.39938 | -0.45501 |

---

|    |   |   |          |          |          |
|----|---|---|----------|----------|----------|
| 29 | 6 | 0 | 6.000015 | -1.72346 | -3.02433 |
| 30 | 1 | 0 | 5.478427 | -2.04493 | -3.93213 |
| 31 | 6 | 0 | 6.197141 | 2.582425 | -0.2599  |
| 32 | 6 | 0 | -4.943   | -0.97034 | 2.315208 |
| 33 | 6 | 0 | 7.97982  | -1.56391 | -1.73486 |
| 34 | 1 | 0 | 9.050623 | -1.75385 | -1.60152 |
| 35 | 6 | 0 | 5.529455 | -3.44832 | 1.205789 |
| 36 | 1 | 0 | 6.525443 | -3.46141 | 1.655156 |
| 37 | 6 | 0 | -5.55044 | 1.979907 | -0.45023 |
| 38 | 6 | 0 | 4.978754 | -4.62143 | 0.69589  |
| 39 | 1 | 0 | 5.547099 | -5.5537  | 0.746243 |
| 40 | 6 | 0 | 7.341352 | -2.0606  | -2.86745 |
| 41 | 6 | 0 | 3.711474 | -4.61046 | 0.11118  |
| 42 | 1 | 0 | 3.283919 | -5.52598 | -0.30289 |
| 43 | 6 | 0 | 6.698498 | 3.852112 | 0.056044 |
| 44 | 1 | 0 | 7.105547 | 4.468337 | -0.75224 |
| 45 | 6 | 0 | 6.084207 | 3.575566 | 2.32654  |
| 46 | 1 | 0 | 5.994981 | 3.969848 | 3.344255 |
| 47 | 6 | 0 | -3.15564 | -2.63005 | 2.272014 |
| 48 | 1 | 0 | -2.17034 | -2.95232 | 1.925921 |
| 49 | 6 | 0 | -5.94949 | -0.75713 | -0.37972 |
| 50 | 6 | 0 | 4.88693  | 1.629356 | 3.218554 |
| 51 | 1 | 0 | 3.938012 | 1.154317 | 2.930614 |
| 52 | 1 | 0 | 4.658861 | 2.368417 | 3.999827 |
| 53 | 1 | 0 | 5.51371  | 0.85235  | 3.681549 |
| 54 | 6 | 0 | 3.877462 | -0.62346 | -2.47686 |
| 55 | 1 | 0 | 3.129683 | -1.28402 | -2.01018 |
| 56 | 1 | 0 | 3.755909 | -0.73553 | -3.56358 |
| 57 | 1 | 0 | 3.604492 | 0.411458 | -2.2303  |
| 58 | 6 | 0 | -5.70399 | -1.86195 | 3.075135 |
| 59 | 1 | 0 | -6.70905 | -1.56408 | 3.38337  |
| 60 | 6 | 0 | 6.685881 | 4.363997 | 1.349779 |

---

|    |   |   |          |          |          |
|----|---|---|----------|----------|----------|
| 61 | 6 | 0 | -5.37803 | -1.92839 | -0.93714 |
| 62 | 6 | 0 | -5.69463 | 3.213471 | 0.243581 |
| 63 | 6 | 0 | -5.76666 | 2.03242  | -1.85788 |
| 64 | 6 | 0 | 8.171567 | -0.31927 | 0.375432 |
| 65 | 1 | 0 | 9.144955 | 0.016758 | -0.01366 |
| 66 | 1 | 0 | 8.384231 | -1.12153 | 1.102168 |
| 67 | 1 | 0 | 7.728066 | 0.521391 | 0.921187 |
| 68 | 6 | 0 | 6.226899 | 2.231771 | -1.72688 |
| 69 | 1 | 0 | 7.034823 | 1.528897 | -1.97581 |
| 70 | 1 | 0 | 6.373849 | 3.141647 | -2.32709 |
| 71 | 1 | 0 | 5.296765 | 1.756373 | -2.06301 |
| 72 | 6 | 0 | -5.20885 | -3.11485 | 3.425243 |
| 73 | 1 | 0 | -5.82923 | -3.80003 | 4.00853  |
| 74 | 6 | 0 | -6.17602 | 3.215759 | -2.48632 |
| 75 | 1 | 0 | -6.33465 | 3.205412 | -3.56966 |
| 76 | 6 | 0 | -6.38251 | 4.40016  | -1.78626 |
| 77 | 6 | 0 | -6.11078 | 4.37357  | -0.42104 |
| 78 | 1 | 0 | -6.21713 | 5.297846 | 0.156252 |
| 79 | 6 | 0 | -3.92819 | -3.50294 | 3.027369 |
| 80 | 1 | 0 | -3.54043 | -4.48901 | 3.291413 |
| 81 | 6 | 0 | -7.37019 | -0.74182 | -0.26649 |
| 82 | 6 | 0 | -6.17546 | -3.04281 | -1.2369  |
| 83 | 1 | 0 | -5.69348 | -3.93197 | -1.65739 |
| 84 | 6 | 0 | -5.55797 | 0.856117 | -2.77819 |
| 85 | 1 | 0 | -4.65511 | 0.280649 | -2.53598 |
| 86 | 1 | 0 | -5.46429 | 1.19975  | -3.8188  |
| 87 | 1 | 0 | -6.39368 | 0.142396 | -2.73147 |
| 88 | 6 | 0 | -8.16168 | 0.497293 | 0.079852 |
| 89 | 1 | 0 | -7.7333  | 1.096498 | 0.890812 |
| 90 | 1 | 0 | -9.19244 | 0.233705 | 0.358359 |
| 91 | 1 | 0 | -8.21351 | 1.172384 | -0.78987 |
| 92 | 6 | 0 | 7.28089  | 5.703113 | 1.674179 |

---

|     |   |   |          |          |          |
|-----|---|---|----------|----------|----------|
| 93  | 1 | 0 | 7.236355 | 6.385951 | 0.812664 |
| 94  | 1 | 0 | 8.343043 | 5.60269  | 1.955121 |
| 95  | 1 | 0 | 6.765442 | 6.182197 | 2.52004  |
| 96  | 5 | 0 | 5.20555  | 0.175254 | 0.429723 |
| 97  | 6 | 0 | -7.5503  | -3.05865 | -1.03415 |
| 98  | 6 | 0 | -5.40063 | 3.391048 | 1.71218  |
| 99  | 1 | 0 | -6.12927 | 2.872102 | 2.351917 |
| 100 | 1 | 0 | -5.43266 | 4.456402 | 1.980653 |
| 101 | 1 | 0 | -4.40355 | 3.014681 | 1.98369  |
| 102 | 6 | 0 | -3.9223  | -2.08198 | -1.31633 |
| 103 | 1 | 0 | -3.4651  | -1.15002 | -1.67076 |
| 104 | 1 | 0 | -3.82628 | -2.81307 | -2.13205 |
| 105 | 1 | 0 | -3.30757 | -2.45902 | -0.48442 |
| 106 | 6 | 0 | -8.12726 | -1.87608 | -0.57377 |
| 107 | 1 | 0 | -9.21559 | -1.82561 | -0.46182 |
| 108 | 5 | 0 | -5.17542 | 0.545459 | 0.277937 |
| 109 | 6 | 0 | 8.063235 | -2.91151 | -3.87185 |
| 110 | 1 | 0 | 7.991711 | -3.9807  | -3.6084  |
| 111 | 1 | 0 | 9.13349  | -2.66044 | -3.92089 |
| 112 | 1 | 0 | 7.638788 | -2.79678 | -4.88057 |
| 113 | 6 | 0 | -6.87519 | 5.644145 | -2.46646 |
| 114 | 1 | 0 | -6.58903 | 5.665876 | -3.52851 |
| 115 | 1 | 0 | -6.48158 | 6.552237 | -1.98559 |
| 116 | 1 | 0 | -7.97591 | 5.705314 | -2.4242  |
| 117 | 6 | 0 | -8.37711 | -4.28269 | -1.30278 |
| 118 | 1 | 0 | -9.36604 | -4.02226 | -1.70994 |
| 119 | 1 | 0 | -8.54968 | -4.8551  | -0.37532 |
| 120 | 1 | 0 | -7.88161 | -4.95827 | -2.01583 |
| 121 | 6 | 0 | 5.372443 | -0.93896 | 1.639777 |
| 122 | 1 | 0 | 4.784426 | -0.66487 | 2.525932 |
| 123 | 1 | 0 | 6.408219 | -1.05218 | 1.977799 |
| 124 | 6 | 0 | -5.41324 | 0.38225  | 1.904848 |
| 125 | 1 | 0 | -6.45931 | 0.518512 | 2.203666 |

---

|     |   |   |          |          |          |
|-----|---|---|----------|----------|----------|
| 126 | 1 | 0 | -4.82287 | 1.116236 | 2.473111 |
|-----|---|---|----------|----------|----------|

**BN<sub>2</sub><sup>-</sup>**, Ea = -2400.08303 a.u.

---

| Center<br>Number | Atomic<br>Number | Atomic<br>Type | Coordinates (Angstroms) |          |          |
|------------------|------------------|----------------|-------------------------|----------|----------|
|                  |                  |                | X                       | Y        | Z        |
| 1                | 7                | 0              | 3.558305                | 0.100388 | -0.00897 |
| 2                | 7                | 0              | -3.55886                | 0.095045 | -0.00633 |
| 3                | 6                | 0              | 0.715444                | 0.1545   | 0.034567 |
| 4                | 6                | 0              | -0.71603                | 0.153073 | 0.034969 |
| 5                | 6                | 0              | 3.801549                | -0.90033 | 2.058259 |
| 6                | 6                | 0              | 1.490164                | 0.729834 | -1.02369 |
| 7                | 1                | 0              | 1.009808                | 1.222217 | -1.86846 |
| 8                | 6                | 0              | 2.863744                | -0.40669 | 1.054002 |
| 9                | 6                | 0              | 2.858932                | 0.694698 | -1.00202 |
| 10               | 1                | 0              | 3.449165                | 1.155448 | -1.79381 |
| 11               | 6                | 0              | -1.48633                | -0.40615 | 1.095213 |
| 12               | 1                | 0              | -1.00258                | -0.83004 | 1.974369 |
| 13               | 6                | 0              | -2.86265                | -0.41536 | 1.053929 |
| 14               | 6                | 0              | 5.939284                | -1.16079 | -0.69563 |
| 15               | 6                | 0              | 5.130779                | -0.63282 | 1.671179 |
| 16               | 6                | 0              | -1.49247                | 0.729886 | -1.02122 |
| 17               | 1                | 0              | -1.01352                | 1.225648 | -1.86481 |
| 18               | 6                | 0              | 5.317496                | -2.27224 | -1.32114 |
| 19               | 6                | 0              | 1.487434                | -0.39979 | 1.096187 |
| 20               | 1                | 0              | 1.00505                 | -0.82006 | 1.977825 |
| 21               | 6                | 0              | 5.660584                | 1.548493 | -0.14603 |
| 22               | 6                | 0              | 7.358233                | -1.13016 | -0.71824 |
| 23               | 6                | 0              | -2.86119                | 0.693037 | -0.99834 |
| 24               | 1                | 0              | -3.45267                | 1.155372 | -1.78824 |
| 25               | 6                | 0              | 5.66493                 | 2.555138 | 0.855311 |
| 26               | 6                | 0              | -3.79883                | -0.91649 | 2.05603  |

---

|    |   |   |          |          |          |
|----|---|---|----------|----------|----------|
| 27 | 6 | 0 | 3.482487 | -1.55211 | 3.253948 |
| 28 | 1 | 0 | 2.440744 | -1.74949 | 3.521657 |
| 29 | 6 | 0 | 6.082263 | -3.23876 | -1.98507 |
| 30 | 1 | 0 | 5.563778 | -4.07427 | -2.46861 |
| 31 | 6 | 0 | 6.007368 | 1.958772 | -1.4595  |
| 32 | 6 | 0 | -5.12883 | -0.65033 | 1.670732 |
| 33 | 6 | 0 | 8.088114 | -2.12437 | -1.38255 |
| 34 | 1 | 0 | 9.182344 | -2.05948 | -1.38469 |
| 35 | 6 | 0 | 6.144649 | -1.08471 | 2.524487 |
| 36 | 1 | 0 | 7.193694 | -0.94495 | 2.253565 |
| 37 | 6 | 0 | -5.66169 | 1.543779 | -0.12917 |
| 38 | 6 | 0 | 5.840833 | -1.72222 | 3.726804 |
| 39 | 1 | 0 | 6.650587 | -2.05331 | 4.383663 |
| 40 | 6 | 0 | 7.47372  | -3.18627 | -2.03959 |
| 41 | 6 | 0 | 4.511377 | -1.95468 | 4.097677 |
| 42 | 1 | 0 | 4.283339 | -2.46251 | 5.038491 |
| 43 | 6 | 0 | 6.404686 | 3.28012  | -1.71522 |
| 44 | 1 | 0 | 6.666683 | 3.560053 | -2.74181 |
| 45 | 6 | 0 | 6.077927 | 3.858978 | 0.563701 |
| 46 | 1 | 0 | 6.073856 | 4.604263 | 1.366865 |
| 47 | 6 | 0 | -3.4779  | -1.5744  | 3.247852 |
| 48 | 1 | 0 | -2.43561 | -1.77053 | 3.514372 |
| 49 | 6 | 0 | -5.93963 | -1.16058 | -0.70107 |
| 50 | 6 | 0 | 5.202699 | 2.290671 | 2.263909 |
| 51 | 1 | 0 | 4.198854 | 1.842198 | 2.283977 |
| 52 | 1 | 0 | 5.166244 | 3.225522 | 2.842749 |
| 53 | 1 | 0 | 5.861114 | 1.587232 | 2.793929 |
| 54 | 6 | 0 | 3.82798  | -2.50328 | -1.29681 |
| 55 | 1 | 0 | 3.44163  | -2.55262 | -0.26801 |
| 56 | 1 | 0 | 3.579213 | -3.45517 | -1.7882  |
| 57 | 1 | 0 | 3.262134 | -1.71077 | -1.80828 |
| 58 | 6 | 0 | -6.14146 | -1.11048 | 2.521036 |



---

|    |   |   |          |          |          |
|----|---|---|----------|----------|----------|
| 59 | 1 | 0 | -7.19087 | -0.97227 | 2.250669 |
| 60 | 6 | 0 | 6.471283 | 4.246233 | -0.71685 |
| 61 | 6 | 0 | -5.31807 | -2.27147 | -1.32761 |
| 62 | 6 | 0 | -5.66613 | 2.542385 | 0.880364 |
| 63 | 6 | 0 | -6.00927 | 1.964806 | -1.43901 |
| 64 | 6 | 0 | 8.180615 | -0.03251 | -0.0836  |
| 65 | 1 | 0 | 8.355053 | 0.79736  | -0.78835 |
| 66 | 1 | 0 | 9.165158 | -0.42038 | 0.221482 |
| 67 | 1 | 0 | 7.701925 | 0.421292 | 0.790976 |
| 68 | 6 | 0 | 5.98991  | 1.043803 | -2.66286 |
| 69 | 1 | 0 | 6.925961 | 0.469971 | -2.75411 |
| 70 | 1 | 0 | 5.869126 | 1.632733 | -3.58527 |
| 71 | 1 | 0 | 5.192225 | 0.291729 | -2.62902 |
| 72 | 6 | 0 | -5.83583 | -1.75441 | 3.719469 |
| 73 | 1 | 0 | -6.6446  | -2.09211 | 4.374151 |
| 74 | 6 | 0 | -6.40739 | 3.288037 | -1.68376 |
| 75 | 1 | 0 | -6.67002 | 3.576178 | -2.70792 |
| 76 | 6 | 0 | -6.47403 | 4.245917 | -0.6776  |
| 77 | 6 | 0 | -6.07991 | 3.848311 | 0.599563 |
| 78 | 1 | 0 | -6.07587 | 4.586981 | 1.408813 |
| 79 | 6 | 0 | -4.50568 | -1.98497 | 4.089092 |
| 80 | 1 | 0 | -4.2762  | -2.49778 | 5.026846 |
| 81 | 6 | 0 | -7.35861 | -1.12862 | -0.72626 |
| 82 | 6 | 0 | -6.08233 | -3.23279 | -1.99991 |
| 83 | 1 | 0 | -5.56431 | -4.07131 | -2.47861 |
| 84 | 6 | 0 | -5.99267 | 1.060282 | -2.65031 |
| 85 | 1 | 0 | -5.19994 | 0.302956 | -2.62027 |
| 86 | 1 | 0 | -5.86526 | 1.656645 | -3.56707 |
| 87 | 1 | 0 | -6.93207 | 0.493232 | -2.74976 |
| 88 | 6 | 0 | -8.18128 | -0.03849 | -0.07911 |
| 89 | 1 | 0 | -7.70245 | 0.406081 | 0.800123 |
| 90 | 1 | 0 | -9.16536 | -0.4305  | 0.22219  |

---

|     |   |   |          |          |          |
|-----|---|---|----------|----------|----------|
| 91  | 1 | 0 | -8.35681 | 0.798832 | -0.77468 |
| 92  | 6 | 0 | 6.940222 | 5.645522 | -0.9994  |
| 93  | 1 | 0 | 6.901893 | 5.875428 | -2.07489 |
| 94  | 1 | 0 | 7.982967 | 5.79273  | -0.66875 |
| 95  | 1 | 0 | 6.327145 | 6.392073 | -0.47021 |
| 96  | 5 | 0 | 5.150983 | 0.009605 | 0.165432 |
| 97  | 6 | 0 | -7.47304 | -3.17396 | -2.06438 |
| 98  | 6 | 0 | -5.20321 | 2.267212 | 2.286687 |
| 99  | 1 | 0 | -5.8606  | 1.558854 | 2.811363 |
| 100 | 1 | 0 | -5.1677  | 3.197522 | 2.872849 |
| 101 | 1 | 0 | -4.1988  | 1.81987  | 2.302929 |
| 102 | 6 | 0 | -3.83037 | -2.51204 | -1.28812 |
| 103 | 1 | 0 | -3.25412 | -1.7219  | -1.79151 |
| 104 | 1 | 0 | -3.58246 | -3.46422 | -1.77939 |
| 105 | 1 | 0 | -3.45556 | -2.5665  | -0.25529 |
| 106 | 6 | 0 | -8.08801 | -2.11739 | -1.39889 |
| 107 | 1 | 0 | -9.18235 | -2.05459 | -1.3979  |
| 108 | 5 | 0 | -5.15133 | 0.002311 | 0.169684 |
| 109 | 6 | 0 | 8.270954 | -4.2578  | -2.7286  |
| 110 | 1 | 0 | 8.402847 | -5.14111 | -2.07964 |
| 111 | 1 | 0 | 9.275663 | -3.90118 | -3.00238 |
| 112 | 1 | 0 | 7.772129 | -4.60518 | -3.64696 |
| 113 | 6 | 0 | -6.94342 | 5.647371 | -0.94837 |
| 114 | 1 | 0 | -6.91139 | 5.884105 | -2.02257 |
| 115 | 1 | 0 | -6.32642 | 6.39     | -0.41818 |
| 116 | 1 | 0 | -7.98395 | 5.793413 | -0.61033 |
| 117 | 6 | 0 | -8.26714 | -4.20029 | -2.82209 |
| 118 | 1 | 0 | -8.33083 | -3.94738 | -3.8949  |
| 119 | 1 | 0 | -9.2982  | -4.27394 | -2.4436  |
| 120 | 1 | 0 | -7.80795 | -5.19887 | -2.75362 |

**BN2<sup>2-</sup>**,  $E_a = -2400.04697$  a.u.

---

---

| Center<br>Number | Atomic<br>Number | Atomic<br>Type | Coordinates (Angstroms) |          |          |
|------------------|------------------|----------------|-------------------------|----------|----------|
|                  |                  |                | X                       | Y        | Z        |
| 1                | 7                | 0              | -3.58369                | -0.10944 | 0.137518 |
| 2                | 6                | 0              | -5.97574                | 1.159474 | -0.46964 |
| 3                | 6                | 0              | -6.07077                | 1.037186 | 2.772887 |
| 4                | 1                | 0              | -7.12801                | 0.89084  | 2.535486 |
| 5                | 6                | 0              | -5.08431                | 0.613244 | 1.875602 |
| 6                | 6                | 0              | -7.39429                | 1.162105 | -0.42375 |
| 7                | 6                | 0              | -3.73917                | 0.884316 | 2.218867 |
| 8                | 6                | 0              | -8.20362                | 0.064687 | 0.228894 |
| 9                | 1                | 0              | -8.42523                | -0.74761 | -0.4839  |
| 10               | 1                | 0              | -9.16608                | 0.460252 | 0.592736 |
| 11               | 1                | 0              | -7.68467                | -0.4143  | 1.066029 |
| 12               | 6                | 0              | -5.70054                | -1.55301 | 0.063285 |
| 13               | 6                | 0              | -2.83147                | 0.423375 | 1.172398 |
| 14               | 6                | 0              | -6.14269                | 3.253143 | -1.73611 |
| 15               | 1                | 0              | -5.63088                | 4.079089 | -2.24444 |
| 16               | 6                | 0              | -5.36457                | 2.26071  | -1.12753 |
| 17               | 6                | 0              | -5.73885                | 1.65594  | 3.980614 |
| 18               | 1                | 0              | -6.53099                | 1.966096 | 4.669924 |
| 19               | 6                | 0              | -8.13953                | 2.181389 | -1.03322 |
| 20               | 1                | 0              | -9.23453                | 2.140342 | -0.97666 |
| 21               | 6                | 0              | -4.39895                | 1.893713 | 4.306726 |
| 22               | 1                | 0              | -4.14033                | 2.385047 | 5.24987  |
| 23               | 6                | 0              | -3.39555                | 1.517807 | 3.418831 |
| 24               | 1                | 0              | -2.3463                 | 1.718349 | 3.654268 |
| 25               | 6                | 0              | -5.65795                | -2.56873 | 1.05621  |
| 26               | 6                | 0              | -7.53681                | 3.238031 | -1.70868 |
| 27               | 6                | 0              | -6.12413                | -1.95824 | -1.22895 |
| 28               | 6                | 0              | -2.88586                | -0.71251 | -0.87527 |
| 29               | 1                | 0              | -3.48891                | -1.23751 | -1.6184  |
| 30               | 6                | 0              | -6.11686                | -3.86253 | 0.78876  |

---

|    |   |   |          |          |          |
|----|---|---|----------|----------|----------|
| 31 | 1 | 0 | -6.07481 | -4.61169 | 1.588439 |
| 32 | 6 | 0 | -1.46679 | 0.469876 | 1.151499 |
| 33 | 1 | 0 | -0.96049 | 0.889034 | 2.022424 |
| 34 | 6 | 0 | -6.59742 | -4.23712 | -0.46642 |
| 35 | 6 | 0 | -6.56473 | -3.27046 | -1.46557 |
| 36 | 1 | 0 | -6.88572 | -3.54284 | -2.47825 |
| 37 | 6 | 0 | -5.07862 | -2.32059 | 2.423587 |
| 38 | 1 | 0 | -4.07597 | -1.87437 | 2.352379 |
| 39 | 1 | 0 | -4.99691 | -3.26231 | 2.988462 |
| 40 | 1 | 0 | -5.68273 | -1.61542 | 3.012617 |
| 41 | 6 | 0 | -6.13014 | -1.04085 | -2.43008 |
| 42 | 1 | 0 | -7.03306 | -0.41047 | -2.46674 |
| 43 | 1 | 0 | -6.09456 | -1.63218 | -3.35909 |
| 44 | 1 | 0 | -5.28314 | -0.34367 | -2.43546 |
| 45 | 6 | 0 | -1.52963 | -0.6954  | -0.96379 |
| 46 | 1 | 0 | -1.07209 | -1.22441 | -1.80128 |
| 47 | 6 | 0 | -3.87018 | 2.442022 | -1.20134 |
| 48 | 1 | 0 | -3.41339 | 2.484643 | -0.20162 |
| 49 | 1 | 0 | -3.62257 | 3.377922 | -1.72561 |
| 50 | 1 | 0 | -3.36451 | 1.616857 | -1.7245  |
| 51 | 5 | 0 | -5.13773 | -0.02004 | 0.355928 |
| 52 | 6 | 0 | -0.69359 | -0.0453  | 0.040768 |
| 53 | 6 | 0 | -8.34314 | 4.339985 | -2.33848 |
| 54 | 1 | 0 | -8.35353 | 5.248007 | -1.70931 |
| 55 | 1 | 0 | -9.39102 | 4.036833 | -2.49122 |
| 56 | 1 | 0 | -7.931   | 4.635251 | -3.31735 |
| 57 | 6 | 0 | -7.10769 | -5.62783 | -0.72327 |
| 58 | 1 | 0 | -8.09551 | -5.79091 | -0.25672 |
| 59 | 1 | 0 | -6.4292  | -6.39182 | -0.30908 |
| 60 | 1 | 0 | -7.21727 | -5.82406 | -1.80117 |
| 61 | 7 | 0 | 3.583694 | 0.109443 | -0.13753 |
| 62 | 6 | 0 | 5.97573  | -1.15947 | 0.469647 |

---

|    |   |   |          |          |          |
|----|---|---|----------|----------|----------|
| 63 | 6 | 0 | 6.070787 | -1.03719 | -2.77289 |
| 64 | 1 | 0 | 7.128023 | -0.89081 | -2.5355  |
| 65 | 6 | 0 | 5.084318 | -0.61325 | -1.87561 |
| 66 | 6 | 0 | 7.394278 | -1.16212 | 0.423752 |
| 67 | 6 | 0 | 3.739183 | -0.88435 | -2.21886 |
| 68 | 6 | 0 | 8.20362  | -0.06472 | -0.22893 |
| 69 | 1 | 0 | 8.425331 | 0.747532 | 0.483885 |
| 70 | 1 | 0 | 9.166028 | -0.46033 | -0.59285 |
| 71 | 1 | 0 | 7.684635 | 0.414311 | -1.066   |
| 72 | 6 | 0 | 5.700546 | 1.553011 | -0.0633  |
| 73 | 6 | 0 | 2.831475 | -0.4234  | -1.1724  |
| 74 | 6 | 0 | 6.142666 | -3.25311 | 1.736165 |
| 75 | 1 | 0 | 5.630845 | -4.07904 | 2.244504 |
| 76 | 6 | 0 | 5.364558 | -2.26069 | 1.127555 |
| 77 | 6 | 0 | 5.738871 | -1.65597 | -3.98061 |
| 78 | 1 | 0 | 6.531012 | -1.96612 | -4.66992 |
| 79 | 6 | 0 | 8.139512 | -2.18139 | 1.03325  |
| 80 | 1 | 0 | 9.234516 | -2.14035 | 0.976691 |
| 81 | 6 | 0 | 4.398973 | -1.89377 | -4.3067  |
| 82 | 1 | 0 | 4.140356 | -2.38513 | -5.24984 |
| 83 | 6 | 0 | 3.395566 | -1.51787 | -3.41881 |
| 84 | 1 | 0 | 2.346321 | -1.71844 | -3.65424 |
| 85 | 6 | 0 | 5.65796  | 2.568731 | -1.05624 |
| 86 | 6 | 0 | 7.536789 | -3.23801 | 1.708733 |
| 87 | 6 | 0 | 6.124142 | 1.958251 | 1.228933 |
| 88 | 6 | 0 | 2.885862 | 0.71253  | 0.875244 |
| 89 | 1 | 0 | 3.488914 | 1.237541 | 1.618366 |
| 90 | 6 | 0 | 6.116877 | 3.862529 | -0.7888  |
| 91 | 1 | 0 | 6.074831 | 4.611678 | -1.58848 |
| 92 | 6 | 0 | 1.466798 | -0.4699  | -1.1515  |
| 93 | 1 | 0 | 0.960502 | -0.88908 | -2.02242 |
| 94 | 6 | 0 | 6.597422 | 4.237126 | 0.466385 |

---

|     |   |   |          |          |          |
|-----|---|---|----------|----------|----------|
| 95  | 6 | 0 | 6.564742 | 3.270473 | 1.465536 |
| 96  | 1 | 0 | 6.885737 | 3.542865 | 2.478219 |
| 97  | 6 | 0 | 5.078643 | 2.320572 | -2.42362 |
| 98  | 1 | 0 | 4.076001 | 1.874336 | -2.35241 |
| 99  | 1 | 0 | 4.996913 | 3.262296 | -2.98849 |
| 100 | 1 | 0 | 5.682773 | 1.615419 | -3.01264 |
| 101 | 6 | 0 | 6.130153 | 1.040869 | 2.430067 |
| 102 | 1 | 0 | 7.033036 | 0.410428 | 2.466694 |
| 103 | 1 | 0 | 6.094642 | 1.632202 | 3.359076 |
| 104 | 1 | 0 | 5.283107 | 0.343738 | 2.43548  |
| 105 | 6 | 0 | 1.529632 | 0.69542  | 0.963767 |
| 106 | 1 | 0 | 1.072092 | 1.224443 | 1.801241 |
| 107 | 6 | 0 | 3.870159 | -2.44198 | 1.201384 |
| 108 | 1 | 0 | 3.413364 | -2.48461 | 0.201668 |
| 109 | 1 | 0 | 3.622548 | -3.37787 | 1.725664 |
| 110 | 1 | 0 | 3.364502 | -1.61681 | 1.724538 |
| 111 | 5 | 0 | 5.137733 | 0.020039 | -0.35594 |
| 112 | 6 | 0 | 0.6936   | 0.045292 | -0.04078 |
| 113 | 6 | 0 | 8.343108 | -4.33995 | 2.338561 |
| 114 | 1 | 0 | 8.353458 | -5.248   | 1.709444 |
| 115 | 1 | 0 | 9.390997 | -4.03682 | 2.491257 |
| 116 | 1 | 0 | 7.930987 | -4.63516 | 3.317466 |
| 117 | 6 | 0 | 7.107625 | 5.627857 | 0.72323  |
| 118 | 1 | 0 | 8.095105 | 5.791229 | 0.256049 |
| 119 | 1 | 0 | 6.428723 | 6.391835 | 0.30969  |
| 120 | 1 | 0 | 7.217895 | 5.823851 | 1.801105 |

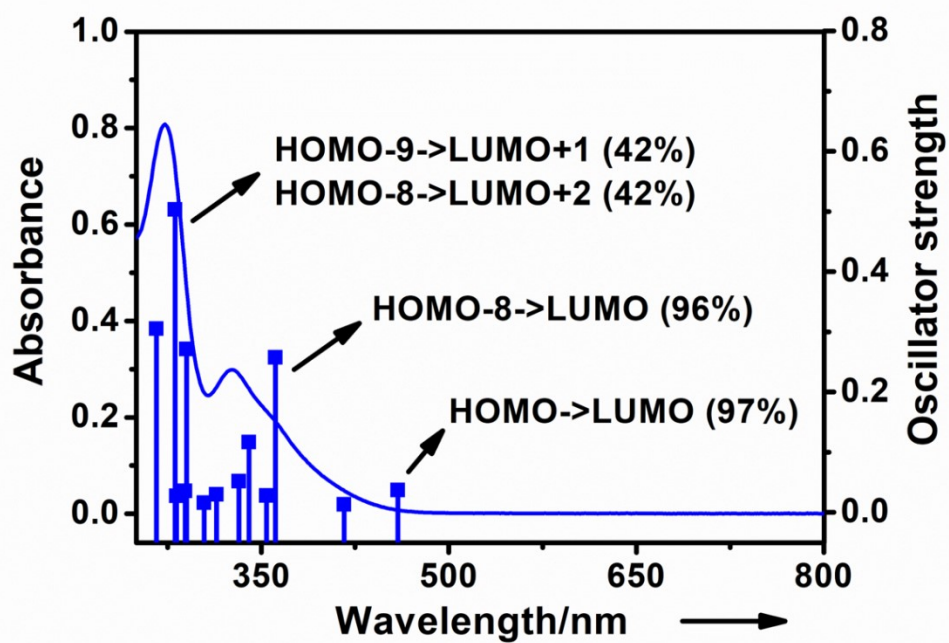

Figure S24. UV/Vis absorption spectrum of **BN2** in THF solution at room temperature along with transitions calculated at the PBE1PBE/def2svp level of theory.

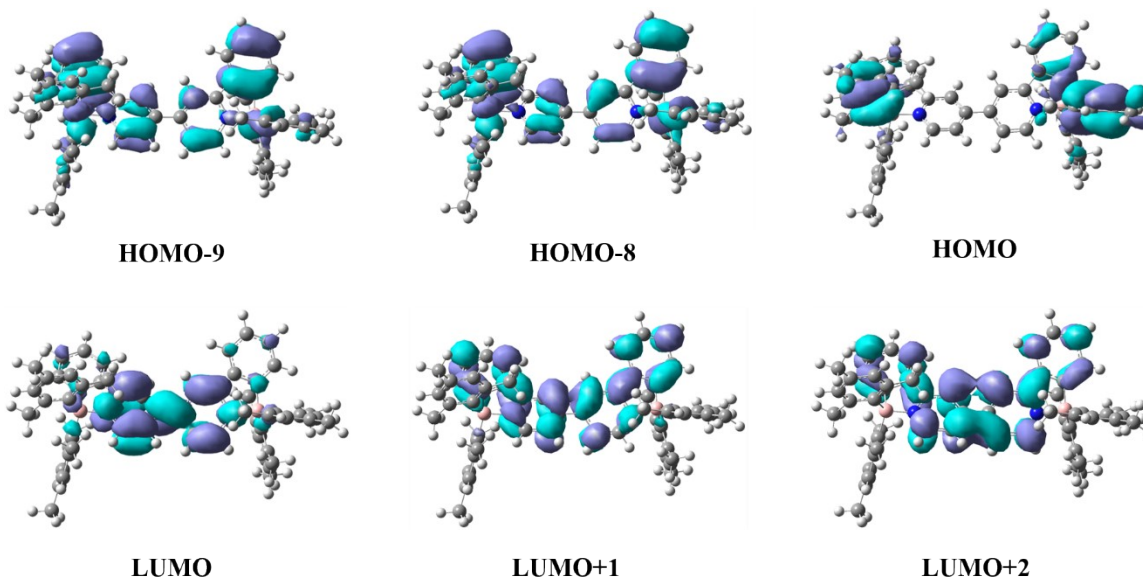

Figure S25. HOMO-9, HOMO-8, HOMO, LUMO, LUMO+1 and LUMO+2 of **BN2** (Isovalue = 0.02).

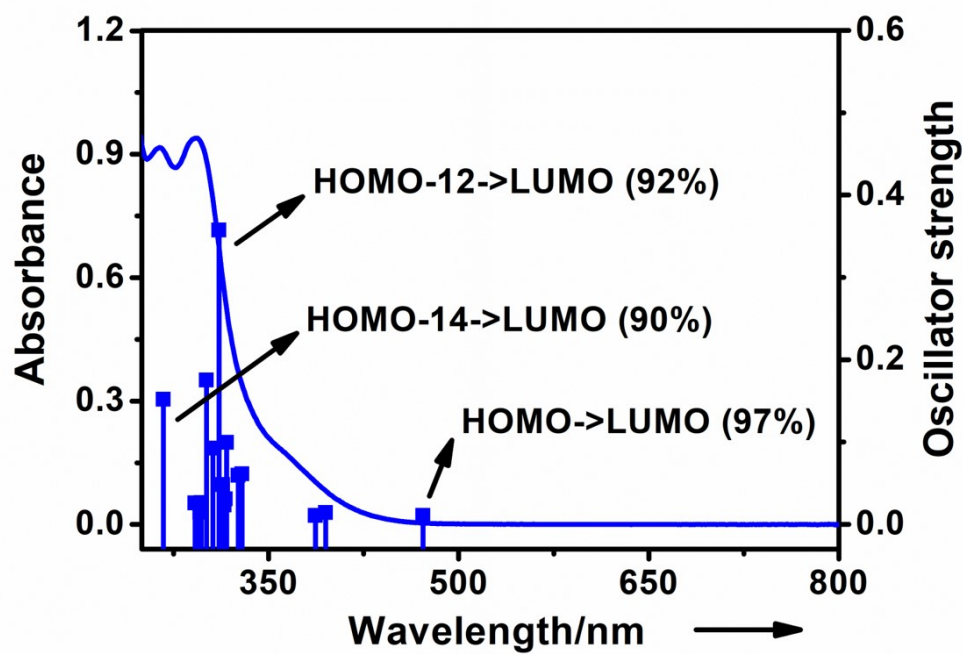

Figure S26. UV/Vis absorption spectrum of **BN4** in THF solution at room temperature along with transitions calculated at the PBE1PBE/def2svp level of theory.

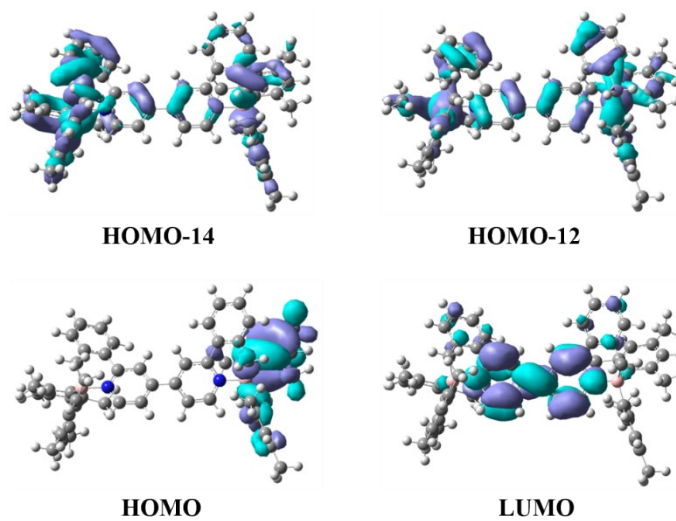

Figure S27. HOMO-14, HOMO-12, HOMO and LUMO of **BN4** (Isovalue = 0.02).



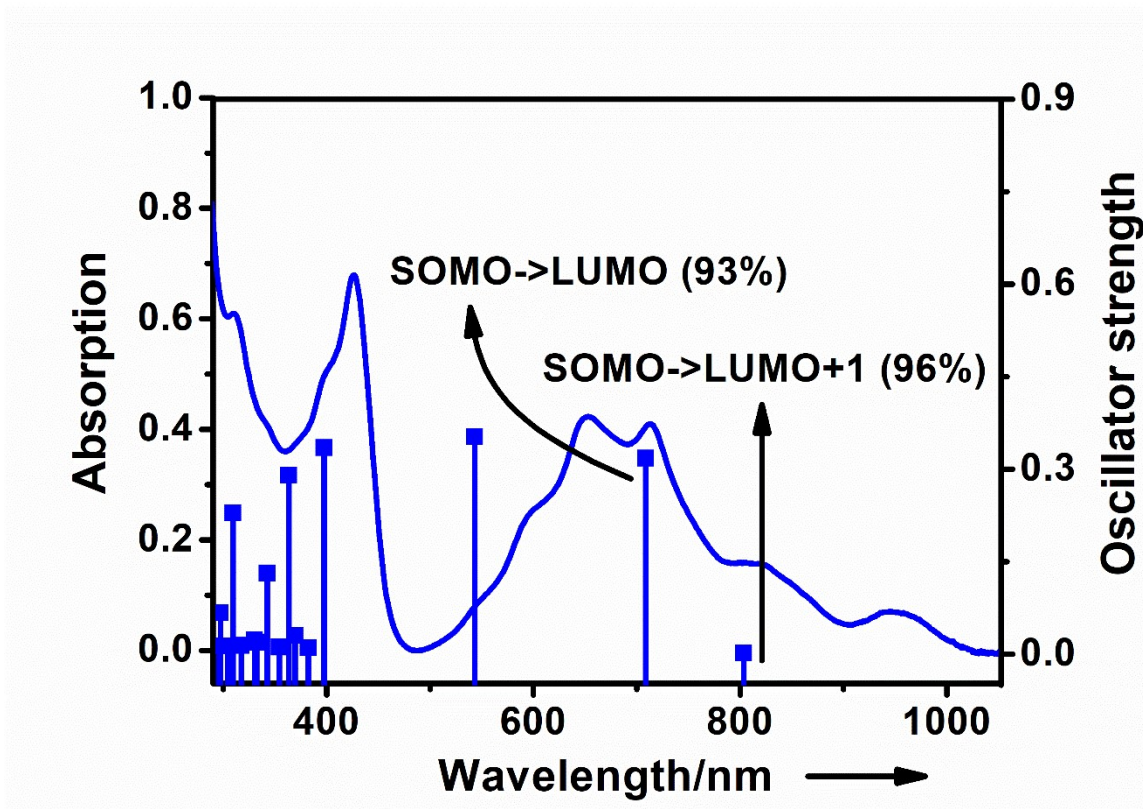

Figure S28. UV/Vis absorption spectrum of **BN2K(crypt)** in THF solution at room temperature along with transitions calculated at the UPBE1PBE/def2svp level of theory.

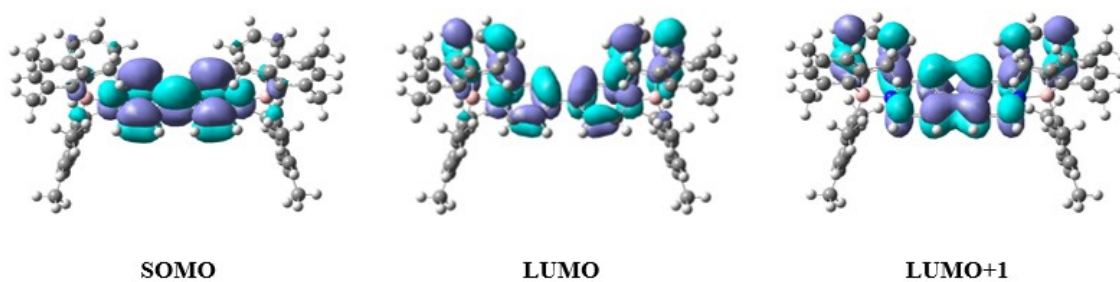

Figure S29. SOMO, LUMO and LUMO+1 of **BN2<sup>-</sup>** (Isovalue = 0.02).

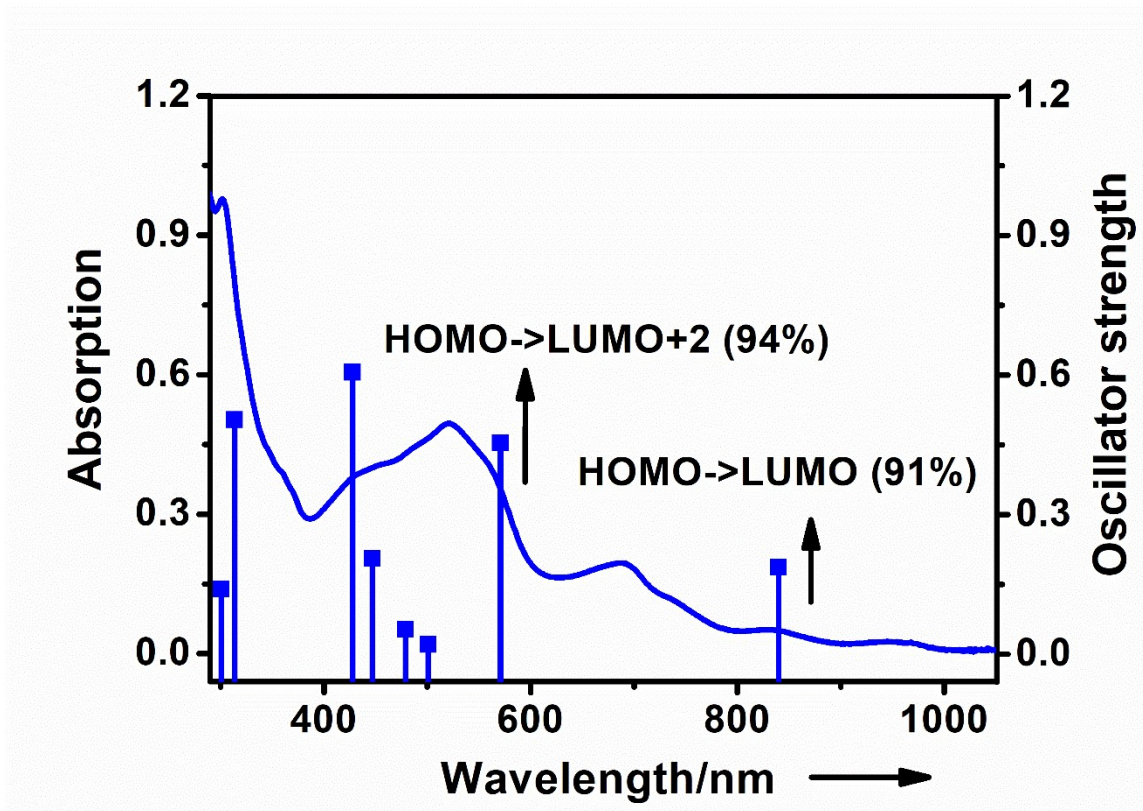

Figure S30. UV/Vis absorption spectrum of  $\text{BN}_2\text{K}_2(\text{18c6})_2$  in THF solution at room temperature along with transitions calculated at the PBE1PBE/def2svp level of theory.

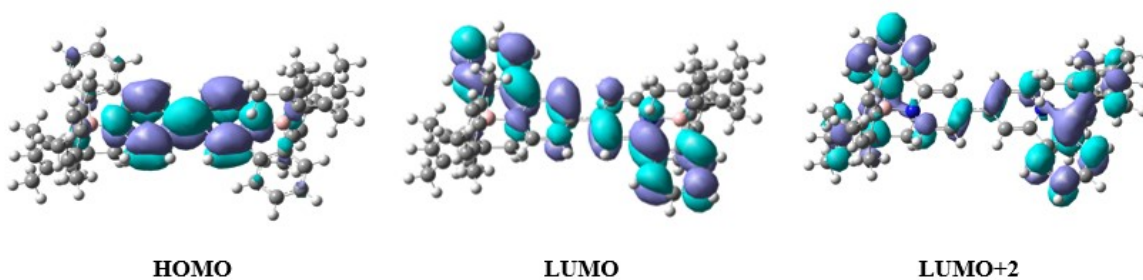

Figure S31. HOMO, LUMO and LUMO+2 of  $\text{BN}_2^{2-}$  (Isovalue = 0.02).

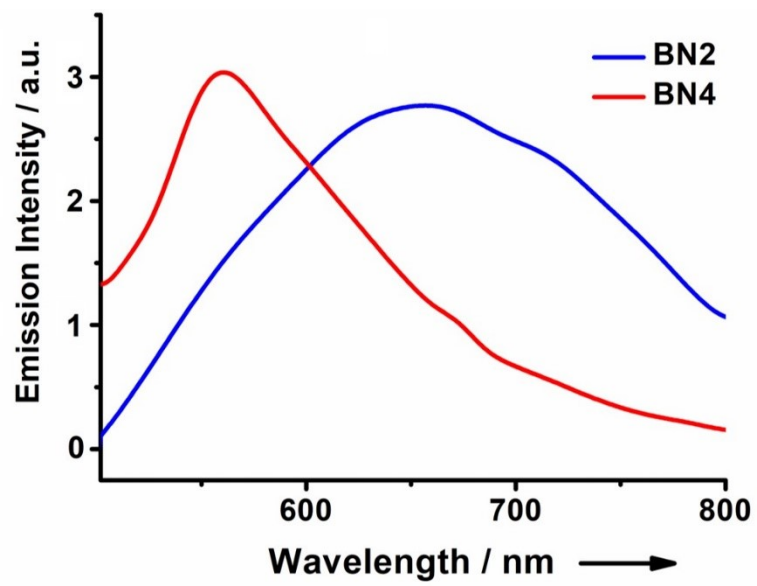

Figure S32. Fluorescent spectra of **BN2** and **BN4**.

---

**S7. X-Ray Crystal Structure Data**

|                                                        | <b>BN2K(crypt)</b>                                                             | <b>BN2K<sub>2</sub>(18c6)<sub>2</sub></b>                                                      |
|--------------------------------------------------------|--------------------------------------------------------------------------------|------------------------------------------------------------------------------------------------|
| CCDC No.                                               | 2181040                                                                        | 2181041                                                                                        |
| Formula                                                | C <sub>80</sub> H <sub>102</sub> B <sub>2</sub> KN <sub>4</sub> O <sub>7</sub> | C <sub>106</sub> H <sub>154</sub> B <sub>2</sub> K <sub>2</sub> N <sub>2</sub> O <sub>18</sub> |
| Formula weight                                         | 1292.37                                                                        | 1844.12                                                                                        |
| Temp. (K)                                              | 180(2)                                                                         | 180(2)                                                                                         |
| Crystal system                                         | Monoclinic                                                                     | Monoclinic                                                                                     |
| Space group                                            | <i>P</i> 2 <sub>1</sub> / <i>c</i>                                             | <i>C</i> 2/ <i>c</i>                                                                           |
| <i>a</i> (Å)                                           | 13.8912(4)                                                                     | 31.8072(17)                                                                                    |
| <i>b</i> (Å)                                           | 26.8301(7)                                                                     | 12.8637(7)                                                                                     |
| <i>c</i> (Å)                                           | 22.9414(6)                                                                     | 26.0895(14)                                                                                    |
| $\alpha$ (°)                                           | 90                                                                             | 90                                                                                             |
| $\beta$ (°)                                            | 107.383(3)                                                                     | 99.889(6)                                                                                      |
| $\gamma$ (°)                                           | 90                                                                             | 90                                                                                             |
| <i>V</i> [Å <sup>3</sup> ]                             | 8159.8(4)                                                                      | 10516.1(10)                                                                                    |
| <i>Z</i>                                               | 4                                                                              | 4                                                                                              |
| $\rho_{\text{calcd}}$ (g·cm <sup>-3</sup> )            | 1.052                                                                          | 1.165                                                                                          |
| $\mu$ (mm <sup>-1</sup> )                              | 0.115                                                                          | 0.154                                                                                          |
| <i>F</i> (000)                                         | 2780                                                                           | 3984                                                                                           |
| Collected data                                         | 100990                                                                         | 77775                                                                                          |
| Unique data                                            | 16076 [ <i>R</i> (int) = 0.0300]                                               | 9220 [ <i>R</i> (int) = 0.0962]                                                                |
| GOF on <i>F</i> <sup>2</sup>                           | 1.036                                                                          | 1.059                                                                                          |
| Final <i>R</i> indexes<br>[ <i>I</i> > 2σ( <i>I</i> )] | <i>R</i> <sub>1</sub> = 0.0514<br>$\omega R_2$ = 0.1406                        | <i>R</i> <sub>1</sub> = 0.0999<br>$\omega R_2$ = 0.2527                                        |
| <i>R</i> indexes (all data)                            | <i>R</i> <sub>1</sub> = 0.0632<br>$\omega R_2$ = 0.1483                        | <i>R</i> <sub>1</sub> = 0.1535<br>$\omega R_2$ = 0.2909                                        |
| Completeness                                           | 0.999                                                                          | 0.994                                                                                          |

---

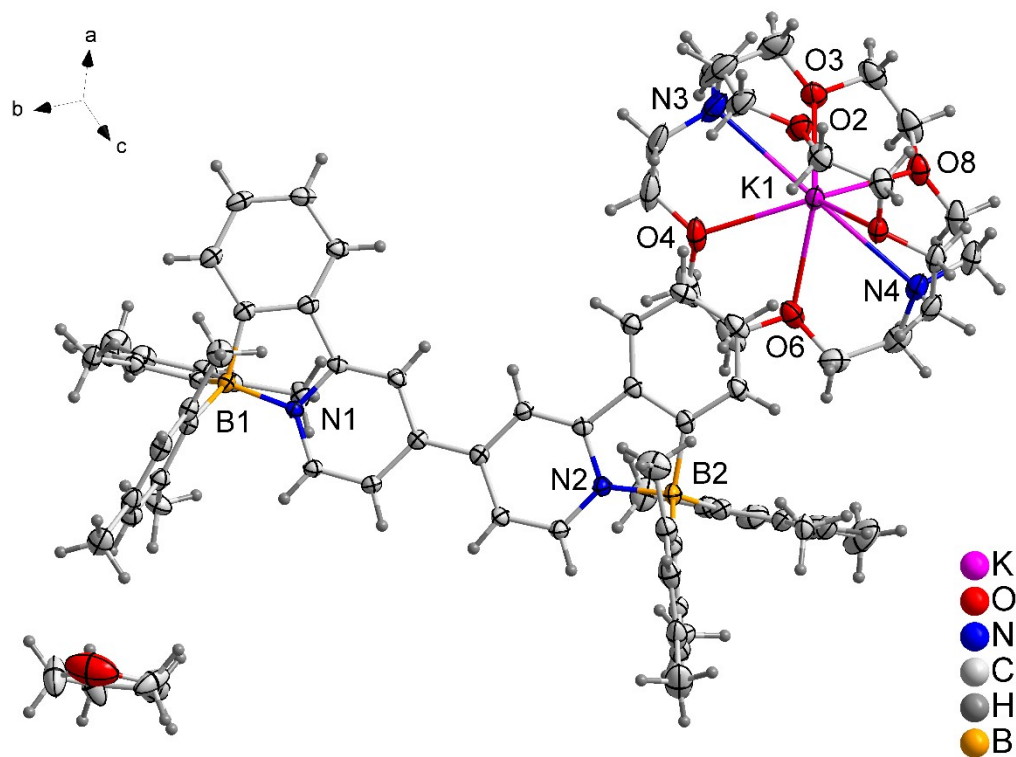

Figure S33. Structure of **BN2K(crypt)**.

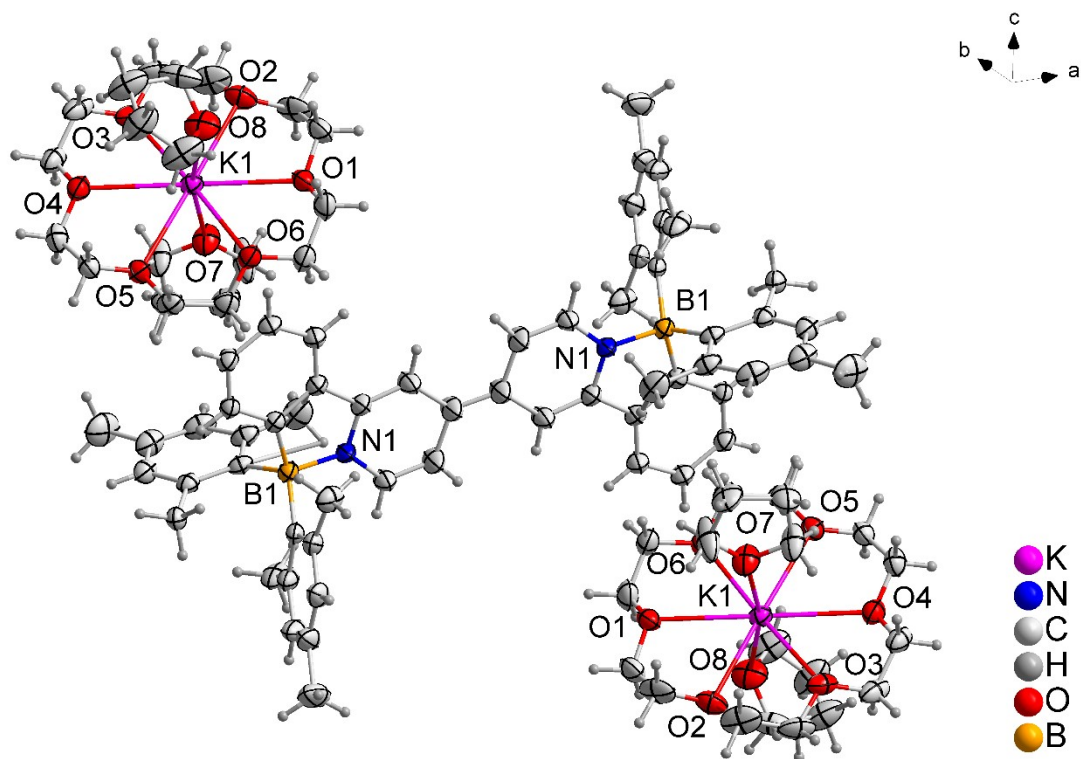

Figure S34. Structure of **BN2K<sub>2</sub>(18c6)<sub>2</sub>**.

---

## S8. References

- S1. Y.-L. Rao, H. Amarne, S.-B. Zhao, T. M. McCormick, S. Martić, Y. Sun, R.-Y. Wang and S. Wang, *J. Am. Chem. Soc.*, **2008**, 130, 12898-12900.
- S2. J.-S. Lu, S.-B. Ko, N. R. Walters, Y. Kang, F. Sauriol, S. Wang, *Angew. Chem. Int. Ed.*, **2013**, 52, 4544-4548.
- S3. Frisch, M. J.; Trucks, G. W.; Schlegel, H. B.; Scuseria, G. E.; Robb, M. A.; Cheeseman, S109 J. R.; Scalmani, G.; Barone, V.; Petersson, G. A.; Nakatsuji, H.; Li, X.; Caricato, M.; Marenich, A.V.; Bloino, J.; Janesko, B. G.; Gomperts, R.; Mennucci, B.; Hratchian, H. P.; Ortiz, J. V.; Izmaylov, A. F.; Sonnenberg, J. L.; Williams-Young, D.; Ding, F.; Lipparini, F.; Egidi, F.; Goings, J.; Peng, B.; Petrone, A.; Henderson, T.; Ranasinghe, D.; Zakrzewski, V. G.; Gao, J.; Rega, N.; Zheng, G.; Liang, W.; Hada, M.; Ehara, M.; Toyota, K.; Fukuda, R.; Hasegawa, J.; Ishida, M.; Nakajima, T.; Honda, Y.; Kitao, O.; Nakai, H.; Vreven, T.; Throssell, K.; Montgomery, J. A., Jr.; Peralta, J. E.; Ogliaro, F.; Bearpark, M. J.; Heyd, J. J.; Brothers, E. N.; Kudin, K. N.; Staroverov, V. N.; Keith, T. A.; Kobayashi, R.; Normand, J.; Raghavachari, K.; Rendell, A. P.; Burant, J. C.; Iyengar, S. S.; Tomasi, J.; Cossi, M.; Millam, J. M.; Klene, M.; Adamo, C.; Cammi, R.; Ochterski, J. W.; Martin, R. L.; Morokuma, K.; Farkas, Ö.; Foresman, J. B.; Fox, D. J. Gaussian 16, Revision C.01, Gaussian, Inc., Wallingford CT, **2019**.
